# Supplementary material
Source: PubMed Central journal article supplement (PMC5761489)
Supplement: jc.2017-00876.sm1.pdf [file jc.2017-00876.sm1.pdf]

## Supplement Material

## **Supplement Text 1: Cord blood metabolic profile methods**

### **Cord blood candidate biochemical markers**

Biochemical candidate markers associated with insulin resistance and neonatal growth were measured in plasma cord samples. These included; C-peptide assessed by Electrochemiluminescence immunoassay using Roche Cobas c311 (CV low 6.2%, high 5.1%); Insulin by Electrochemiluminescence immunoassay using Roche Cobas c411 (CV low 7.8%, high 5.4%); glucose by enzymatic, hexokinase using Roche Cobas c311; adiponectin by enzyme linked immunosorbent assay using R&D systems (CV intra 5.4%, inter 12.0%); leptin by enzyme linked immunosorbent assay using R&D systems (CV intra 2.0%, inter 9.3%); IGF-1 and II were assessed by enzyme linked immunosorbent assay using Roche Cobas c311 (CV inter 7.2%, intra 6.6%), respectively. Lipids including HDL, LDL and triglycerides were assessed using homogeneous enzymatic colorimetric using Roche Cobas c311 (CV low 1.8%, high 1.1%).

### **Cord blood metabolomic analyses**

Analysis was performed at LMU Munich. Amino acids, non-esterified fatty acids, carboxylic acids, acylcarnitines and phospholipids were measured in the cord plasma samples (n=607).

50 µL of plasma were thawed and diluted with 450 µl methanol, containing internal standards representing different groups of metabolites. After centrifugation (4000rpm, 10min, room temperature), supernatants were divided according to the following methods:

#### *Amino acids*

100 µL of the supernatant were prepared using derivatisation as previously reported (1). The supernatant was mixed with 50µl butanolic HCl for 15 min at 600 rpm at 60°C. After evaporation, the residue was solved in 50ml flow solution. AA butylester were determined by ion-pair liquid chromatography coupled to mass spectrometry detection (LC-MS/MS). 10 µL of the prepared sample were injected into the HPLC system (HPLC 1100, Agilent, Waldbronn, Germany) and chromatographic separation was performed with an XBridge C18 column (Waters GmbH, Eschborn, Germany). MS detection was performed with an API 2000 triple quadrupole instrument (Sciex, Darmstadt, Germany) with an APCI source operating in positive ion ionization mode. Data acquisition on the mass spectrometer was controlled by Analyst 1.6.2 software (AB Sciex, Darmstadt, Germany). Data handling and quantification were also performed with Analyst 1.6.2 software (AB Sciex, Darmstadt, Germany).

#### *Non-esterified fatty acids*

100 µl of the supernatant were analysed as previously reported (2). The supernatant was mixed for 20 min at 600rpm at room temperature and transferred for LC-MS/ MS analysis. An UPLC diphenyl column (Pursuit UPS Diphenyl, Varian, Darmstadt, Germany) was used for chromatographic separation with an Agilent 1200 SL series HPLC system (Waldbronn, Germany). The injection volume was set to 10 µL with an eluent flow rate of 700 mL/min. A hybrid triple quadrupole mass spectrometer (4000 QTRAP, Sciex, Darmstadt, Germany) operating in negative ESI mode was coupled to the HPLC system for identification of NEFA. With the analytical method applied, fatty acids (FA) are separated according to chain length and number of double bonds, but not according to position of double bonds. NEFA are mentioned as CX:Y. In this nomenclature, X is the length of the carbon chain, Y is the number of double bonds. NEFA sub-groups according to level of saturation were created and the constituents summed.

### *Carboxylic acids*

Metabolites of the TCA cycle and keto-acids were measured by a modified LC-MS/MS method based on previously published methods [Luo 2007, Birkler 2010]. In detail, 100  $\mu\text{L}$  of the supernatant were evaporated to dryness and re-suspended in 50  $\mu\text{L}$  water. Five  $\mu\text{L}$  of the extracted samples were injected to an Agilent 1200 HPLC and molecular species were separated on a Kinetex F5 core-shell HPLC column, 150 x 2.1 mm, 2.6  $\mu\text{m}$  particle size (Phenomenex, Aschaffenburg, Germany). The mobile phase A was water with 1% formic acid and mobile phase B was composed of methanol/ isopropanol (50:50) with 1% formic acid. The gradient elution at a flow rate of 200  $\mu\text{L}/\text{min}$  was from 1% B to 85% B within 9 minutes and turned back to initial conditions of 1% B within 1 minute. Re-equilibration was held for 5 minutes at 1% B. The triple quadrupole mass spectrometer (AB Sciex API4000; Applied Biosystems, Darmstadt, Germany) was operated in negative scheduled multiple reaction monitoring mode using electrospray ionization (ESI).

### *Phospholipids*

Flow-injection mass spectrometry (FIA-MS/MS) was used to analyse polar lipids. 30  $\mu\text{L}$  of the centrifuged supernatant was mixed with 500  $\mu\text{l}$  methanol (containing 1  $\mu\text{M}$  ammonium acetate) for 20 min at 600 rpm and then used for FIA-MS/MS analysis. Samples were analysed with a triple quadrupole mass spectrometer (QTRAP4000, Sciex, Darmstadt, Germany) with an electrospray ionization (ESI) source, which was used in both positive and negative mode. The MS was coupled to a LC system (Agilent, Waldbronn, Germany). MS/MS analysis was run in Multiple Reaction Monitoring (MRM) mode. Analyst 1.6.2 software, followed by in-house processing with the statistical program R (R Project for Statistical Computing, <http://www.r-project.org/>) was used to post-process the entire analytical process.

The analysis comprised diacyl-phosphatidylcholines (PCaa), acyl-alkyl-phosphatidylcholines (plasmalogens, PCae), sphingomyelins (SM), lyso-phosphatidylcholines (lyso-PC) and sum of hexoses which is further mentioned as glucose presenting more than 80% of this value. As a point to note, the analytical technique applied here is not capable of determining the position of the double bonds and the distribution of carbon atoms between fatty acid side chains. The polar lipids are mentioned as CX:Y. In this nomenclature, X is the length of the carbon chain, Y is the number of double bonds, “a” indicates that the acyl chain is bound via an ester bond to the backbone, while “e” means binding by an ether bond.

### *Acylcarnitines*

Flow-injection mass spectrometry (FIA-MS/MS) was used to analyse acylcarnitines (Carn). 100  $\mu\text{L}$  of the centrifuged supernatant were mixed for 20 min at 600 rpm and then used for FIA-MS/MS analysis. Samples were analysed with a triple quadrupole mass spectrometer (QTRAP4000, Sciex, Darmstadt, Germany) with an electrospray ionization (ESI) source, which was used in both positive and negative mode. The MS was coupled to a LC system (Agilent, Waldbronn, Germany). MS/MS analysis was run in Multiple Reaction Monitoring (MRM) mode. Analyst 1.6.2 software, followed by in-house processing with the statistical program R (R Project for Statistical Computing, <http://www.r-project.org/>) was used to post-process the entire analytical process.

As a point to note, the analytical technique applied here is not capable of determining the position of the double bonds and the distribution of carbon atoms between fatty acid side chains. The polar lipids are mentioned as CX:Y. In this nomenclature, X is the length of the carbon chain, Y is the number of double bonds, “a” indicates that the acyl chain is bound via an ester bond to the backbone, while “e” means binding by an ether bond.

## Supplement Text 2: Confounder selection

Confounders were selected based on a-priori knowledge and were selected for the following reasons, as summarised in Supplement Table 1.1

| Variables                  | Reason                                                                                                                                                                                                                                                                                                                       |
|----------------------------|------------------------------------------------------------------------------------------------------------------------------------------------------------------------------------------------------------------------------------------------------------------------------------------------------------------------------|
| <b>Maternal</b>            |                                                                                                                                                                                                                                                                                                                              |
| UPBEAT Intervention        | The intervention was associated with a reduction in maternal gestational weight gain, measures of adiposity and improvements in maternal antenatal diet and physical activity (3). In the offspring, the intervention was associated with a reduction in cord insulin and a measure of central adiposity at 6 months of age. |
| BMI                        | Increasing maternal BMI is associated with raised cord lipid, inflammation markers and markers associated with insulin resistance as well as a determinants of neonatal body composition (4, 5).                                                                                                                             |
| Parity                     | Increasing maternal parity has been shown to be associated with increasing neonatal adiposity as shown in a rural Indian population (6).                                                                                                                                                                                     |
| Ethnicity                  | Maternal ethnicity is differentially associated with neonatal adiposity, for example offspring born to black ethnic groups have reduced birthweight in comparison to those from white ethnic groups (7, 8).                                                                                                                  |
| Socioeconomic status       | Socioeconomic deprivation is associated with reduced educational attainment and poor maternal lifestyle behaviours which are known determinants of neonatal adiposity (9).                                                                                                                                                   |
| Smoker in early pregnancy  | Smoking in pregnancy has been associated with intrauterine growth restriction associated with adverse metabolic adaptation in the fetal metabolic profile as measured in the cord blood (10).                                                                                                                                |
| Gestational weight gain    | Multiple observational studies have demonstrated a linear association between gestational weight gain and neonatal adiposity (11). Gestational weight gain is thought to have a linear relationship with cord adipokines and markers of insulin resistance (12).                                                             |
| Gestational diabetes       | Maternal glycaemia has recently shown to be causal in determining neonatal anthropometry. Furthermore, pathway analysis has identified maternal glucose to be key in determining neonatal anthropometry mediated by fetal metabolic profile at birth (13).                                                                   |
| <b>Neonate</b>             |                                                                                                                                                                                                                                                                                                                              |
| Sex                        | Offspring sex has shown to have a differential influence on cord biomarkers of inflammation and adipokines. Females have also shown to have significantly more adipose tissue in comparison to male offspring (14).                                                                                                          |
| Gestation at delivery      | Preterm delivery has been associated with reduced birthweight, length and measures of adiposity in comparison to infants born at term. More recently the metabolic profile at birth in preterm neonates significantly differs in comparison to offspring born at term (15).                                                  |
| <b>Infant</b>              |                                                                                                                                                                                                                                                                                                                              |
| Mode of early life feeding | Breastfeeding has been demonstrated to be protective against childhood obesity in early life in comparison to offspring formula fed (16).                                                                                                                                                                                    |

**Supplement Table 1.1: A-priori reasoning for selection of maternal, neonatal and infant confounders.**

Based on the selection above and using a directed acyclic graph (Figure 1.1), the following confounders were selected to provide minimal sufficient adjustment to assess the influence of the fetal metabolic profile on neonatal anthropometry;

**Neonatal anthropometry Model 1:** *Fetal confounders*- offspring sex, gestation at delivery, randomisation to UPBEAT intervention

**Neonatal anthropometry; Model 2:** *Maternal & Fetal confounders*- Maternal parity, ethnicity, smoker in early pregnancy, gestational diabetes, gestational weight gain, offspring sex, gestation at delivery, randomisation to UPBEAT Intervention

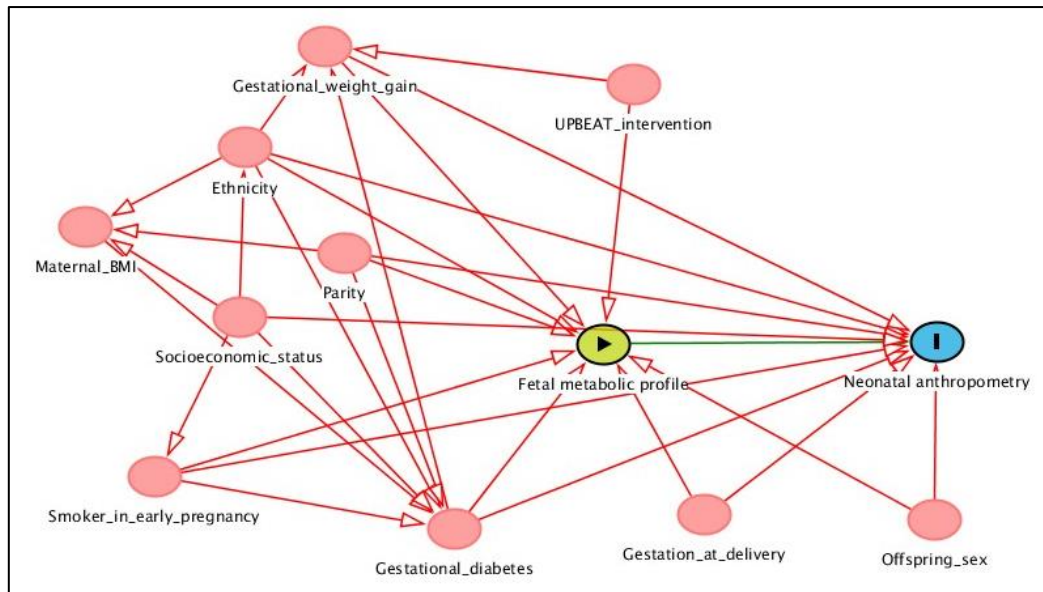

**Figure 1a: Directed acyclic graph to demonstrate inter-relationships between variables potentially confounding the relationship between fetal biochemical profile and neonatal anthropometry.**

Based on the selection above (Table 1.1) and using a directed acyclic graph (Figure 1.2), the following confounders were selected to provide minimal sufficient adjustment to assess the influence of the fetal metabolic profile on neonatal anthropometry;

**Infant at age 6 months:** *Maternal & Fetal confounders-* Maternal parity, ethnicity, smoker in early pregnancy, gestational diabetes, gestational weight gain, mode of early life feeding, randomisation to UPBEAT Intervention (Figure 1.2)

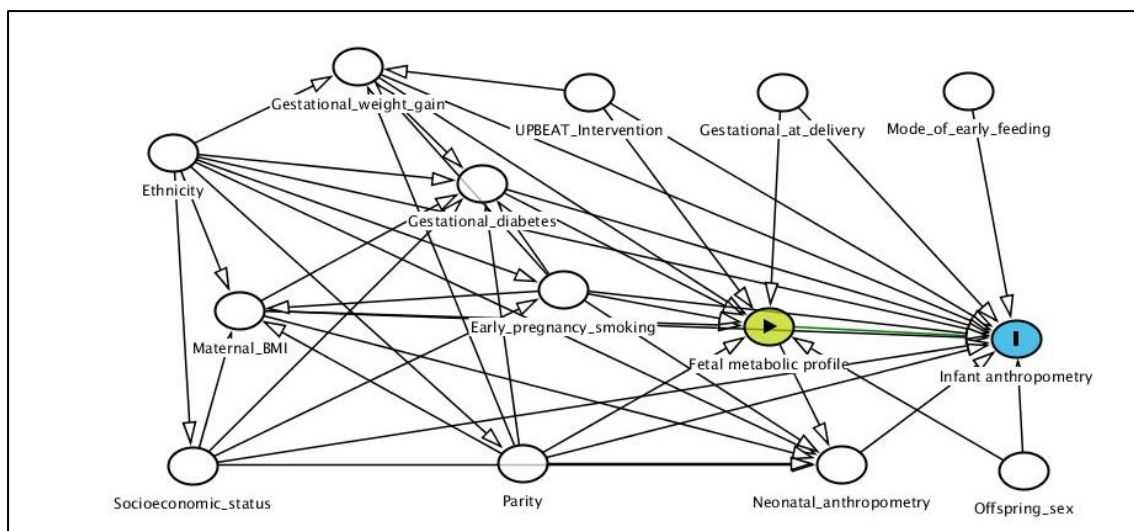

**Figure 1b: Directed acyclic graph to demonstrate inter-relationships between variables potentially confounding the relationship between fetal biochemical profile and infant anthropometry at 6 months of age.**

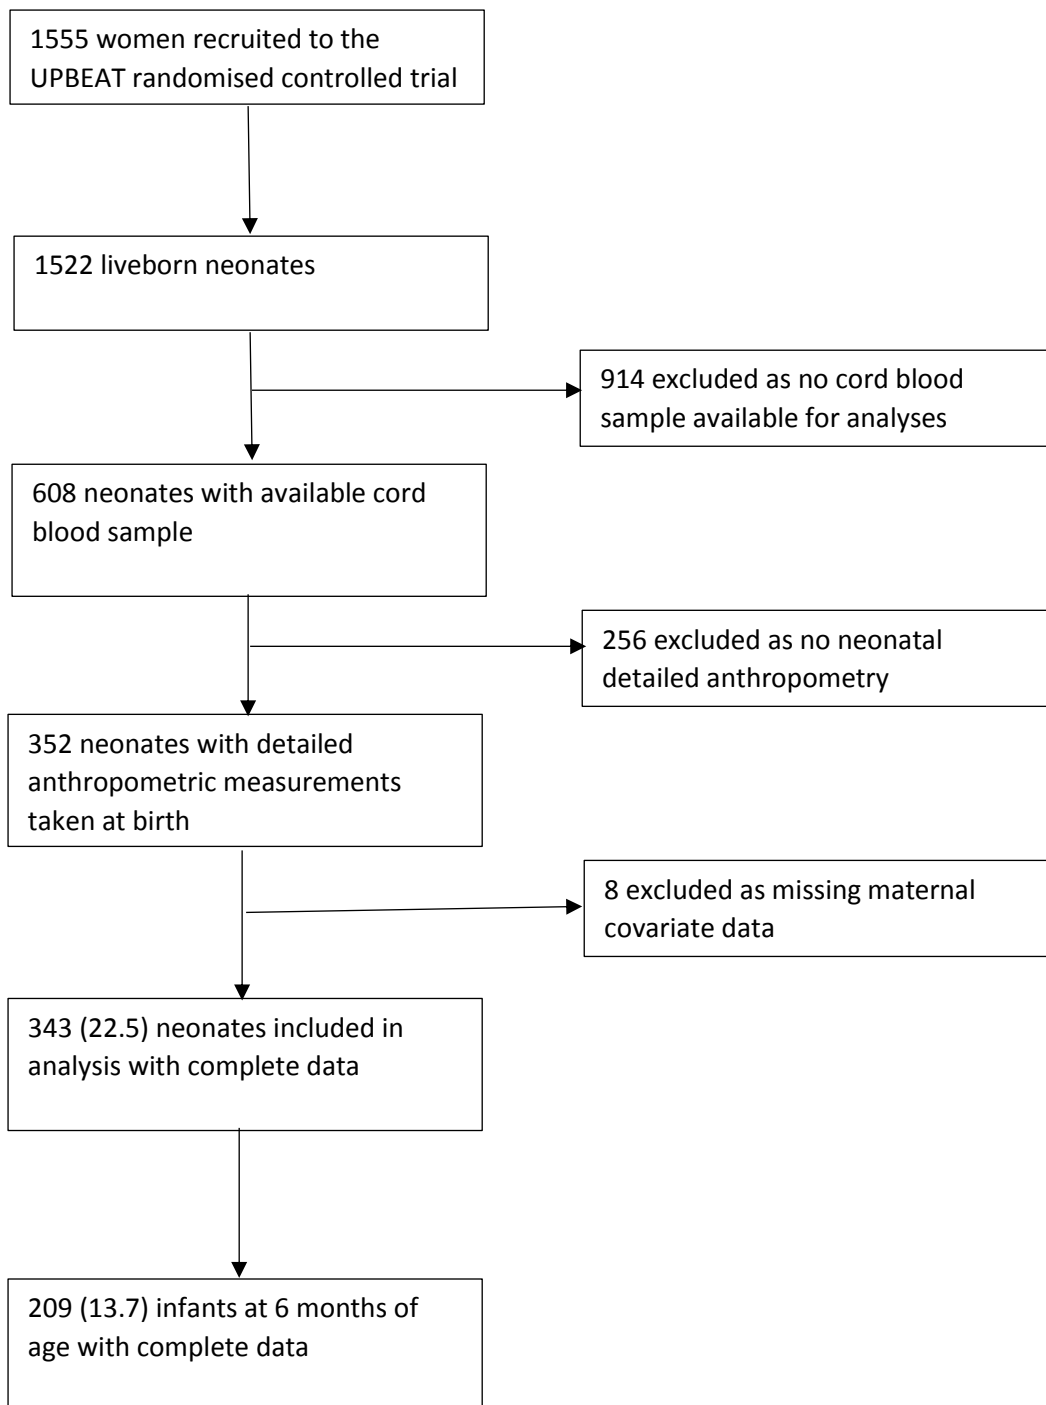

**Supplement Figure 2: Flow diagram of participants included within the analyses**

|                                     |                     | <b>Included within analysis<br/>(n=343)/ (n=247)</b> | <b>Excluded from analysis (n=1211)</b>        | <b>p-value</b> |
|-------------------------------------|---------------------|------------------------------------------------------|-----------------------------------------------|----------------|
|                                     |                     | <b>Mean (SD)/<br/>Median (IQR)/<br/>N (%)</b>        | <b>Mean (SD)/<br/>Median (IQR)/<br/>N (%)</b> |                |
| <b>Maternal</b>                     |                     |                                                      |                                               |                |
| Age (years)                         |                     | 31.0 (27.0, 35.0)                                    | 30.0 (26.0, 35.0)                             | 0.109          |
| BMI (Kg/ m2)                        |                     | 35.6 (33.0, 38.9)                                    | 34.9 (32.7, 38.5)                             | 0.150          |
| Ethnicity                           | Asian               | 19 (5.5)                                             | 76 (6.3)                                      | 0.616          |
|                                     | Black               | 63 (18.4)                                            | 338 (27.9)                                    | 0.001          |
|                                     | Other               | 15 (4.4)                                             | 70 (5.8)                                      | 0.315          |
|                                     | White               | 246 (71.7)                                           | 727 (60.0)                                    | <0.001         |
| Multiparous                         |                     | 165 (48.1)                                           | 715 (59.0)                                    | 0.001          |
| Smoker in early pregnancy           |                     | 19 (5.5)                                             | 89 (7.3)                                      | 0.249          |
| Socioeconomic deprivation           |                     | 295 (86.5)                                           | 1085 (89.9)                                   | 0.102          |
| Gestational weight gain (kg)        |                     | 7.48 (4.07)                                          | 7.51 (4.74)                                   | 0.891          |
| Gestational diabetes                |                     | 111 (32.4)                                           | 269 (27.3)                                    | 0.070          |
| <b>Neonate</b>                      |                     |                                                      |                                               |                |
| Mode of delivery                    | Emergency c-section | 78 (22.7)                                            | 171 (14.5)                                    | 0.159          |
|                                     | Operative vaginal   | 44 (12.8)                                            | 134 (11.4)                                    | <0.001         |
|                                     | Elective c-section  | 83 (24.2)                                            | 212 (18.0)                                    | 0.010          |
|                                     | Vaginal             | 138 (40.2)                                           | 660 (56.1)                                    | <0.001         |
| Gestation at delivery (weeks)       |                     | 39.9 (38.7, 40.9)                                    | 39.9 (38.7, 40.9)                             | <0.001         |
| Birthweight (grams)                 |                     | 3555.0 (3210.0, 3827.0)                              | 3435.0 (3090.0, 3780.0)                       | <0.001         |
| Skinfold thickness subscapular (mm) |                     | 5.78 (1.42)                                          | 5.39 (1.43)                                   | 0.004          |
| Skinfold thickness triceps (mm)     |                     | 5.34 (1.45)                                          | 5.24 (1.61)                                   | 0.494          |
| Sum of skinfold thicknesses (mm)    |                     | 11.12 (2.59)                                         | 10.51 (2.70)                                  | 0.018          |
| Midarm circumference (cm)           |                     | 11.58 (0.97)                                         | 11.34 (1.24)                                  | 0.009          |
| Abdominal circumference (cm)        |                     | 32.63 (2.05)                                         | 32.28 (2.08)                                  | 0.061          |
| <b>Infant at 6 months</b>           |                     |                                                      |                                               |                |
| Weight for age z-score              |                     | 0.29 (1.01)                                          | 0.24 (1.15)                                   | 0.564          |
| Length for age z-score              |                     | 0.44 (1.85)                                          | 0.59 (1.84)                                   | 0.317          |
| BMI for age z-score                 |                     | 0.10 (1.84)                                          | -0.09 (1.80)                                  | 0.208          |
| Arm circumference z-score           |                     | 1.25 (1.47)                                          | 1.04 (1.76)                                   | 0.109          |
| Triceps SFT z-score                 |                     | 0.29 (1.51)                                          | 0.09 (1.48)                                   | 0.098          |
| Subscapular SFT z-score             |                     | 0.30 (1.45)                                          | 0.17 (1.32)                                   | 0.304          |

**Supplement Table 2: Differences in maternal and neonatal demographic, clinical and anthropometric characteristics between mother-offspring pairs included and excluded within the analysis.**

Abbreviations; BMI- Body Mass Index.

| <b>Cord blood biochemical profile</b>             | <b>N</b> | <b>Concentrations (Median/<br/>IQR)</b> |
|---------------------------------------------------|----------|-----------------------------------------|
| <b>Candidate cord blood biomarkers</b>            |          |                                         |
| c-peptide (ng/ml)                                 | 574      | 1.3 (0.9,1.7)                           |
| Insulin (U/ml)                                    | 576      | 6.4 (3.8,10.1)                          |
| Glucose (mmol/l)                                  | 576      | 3.4 (2.4,4.2)                           |
| Triglycerides (mmol/l)                            | 516      | 0.3 (0.3,0.5)                           |
| Cholesterol (mmol/l)                              | 546      | 1.4 (1.1,1.7)                           |
| HDL (mmol/l)                                      | 577      | 41.0 (29.0,62.0)                        |
| IGF I (ng/ml)                                     | 577      | 45.0 (32.0,58.0)                        |
| IGF II (ng/ml)                                    | 577      | 496.0 (441.0,558.0)                     |
| Leptin (ng/ml)                                    | 577      | 14.5 (8.0,24.0)                         |
| Adiponectin (ng/ml)                               | 577      | 31.5 (23.3,39.5)                        |
| IL-6 (pg/ml)                                      | 577      | 4.0 (2.0,8.9)                           |
| TNF-alpha (pg/ml)                                 | 577      | 139.0 (87.0,197.0)                      |
| <b>Metabolites (<math>\mu\text{mol/l}</math>)</b> |          |                                         |
| lyso.PC.a.C14.0                                   | 364      | 1.4 (1.1,1.8)                           |
| lyso.PC.a.C16.0                                   | 607      | 50.6 (39.8,61.4)                        |
| lyso.PC.a.C16.1                                   | 526      | 4.3 (3.1,5.4)                           |
| lyso.PC.a.C18.0                                   | 607      | 9.0 (6.8,11.1)                          |
| lyso.PC.a.C18.1                                   | 526      | 10.4 (8.1,13.6)                         |
| lyso.PC.a.C18.2                                   | 607      | 11.9 (8.7,15.6)                         |
| lyso.PC.a.C18.3                                   | 360      | 0.3 (0.2,0.4)                           |
| lyso.PC.a.C20.3                                   | 526      | 3.0 (2.2,4.0)                           |
| lyso.PC.a.C20.4                                   | 607      | 13.7 (10.3,18.7)                        |
| lyso.PC.a.C20.5                                   | 324      | 0.3 (0.2,0.4)                           |
| lyso.PC.a.C22.5                                   | 400      | 0.4 (0.3,0.7)                           |
| lyso.PC.a.C22.6                                   | 607      | 2.3 (1.6,3.1)                           |
| lyso.PC.e.C18.0                                   | 321      | 0.6 (0.4,0.8)                           |
| PC.aa.C30.0                                       | 522      | 2.8 (2.1,3.6)                           |
| PC.aa.C30.2                                       | 313      | 0.4 (0.3,0.6)                           |
| PC.aa.C32.0                                       | 526      | 16.3 (13.1,21.0)                        |
| PC.aa.C32.1                                       | 525      | 13.7 (10.4,18.4)                        |
| PC.aa.C32.2                                       | 342      | 0.7 (0.4,1.1)                           |
| PC.aa.C34.1                                       | 607      | 126.7 (99.5,161.3)                      |
| PC.aa.C34.2                                       | 607      | 70.9 (55.8,87.8)                        |
| PC.aa.C34.3                                       | 442      | 3.3 (2.6,4.1)                           |
| PC.aa.C34.4                                       | 440      | 0.5 (0.4,0.6)                           |
| PC.aa.C36.0                                       | 520      | 1.8 (1.2,2.5)                           |
| PC.aa.C36.1                                       | 525      | 22.0 (17.9,27.5)                        |
| PC.aa.C36.2                                       | 445      | 42.4 (33.8,52.1)                        |
| PC.aa.C36.3                                       | 607      | 57.1 (46.7,71.1)                        |
| PC.aa.C36.4                                       | 607      | 123.6 (98.3,152.8)                      |
| PC.aa.C36.5                                       | 445      | 3.9 (3.0,5.0)                           |
| PC.aa.C38.0                                       | 523      | 1.2 (1.0,1.7)                           |
| PC.aa.C38.3                                       | 525      | 35.3 (28.1,42.9)                        |
| PC.aa.C38.4                                       | 526      | 96.7 (76.6,119.9)                       |
| PC.aa.C38.5                                       | 445      | 20.9 (16.5,26.3)                        |
| PC.aa.C38.6                                       | 526      | 58.6 (44.7,75.9)                        |
| PC.aa.C40.4                                       | 441      | 3.2 (2.5,4.0)                           |
| PC.aa.C40.5                                       | 524      | 6.4 (4.4,8.4)                           |
| PC.aa.C40.6                                       | 526      | 27.0 (20.0,36.9)                        |
| PC.aa.C42.0                                       | 520      | 0.5 (0.3,0.7)                           |



|              |     |                  |
|--------------|-----|------------------|
| PC.aa.C43.6  | 318 | 0.8 (0.6,1.1)    |
| PC.aa.C44.12 | 441 | 0.5 (0.4,0.6)    |
| PC.ae.C32.0  | 525 | 2.5 (2.0,3.2)    |
| PC.ae.C32.1  | 525 | 2.9 (2.3,3.7)    |
| PC.ae.C32.2  | 443 | 0.8 (0.5,1.1)    |
| PC.ae.C34.0  | 403 | 1.3 (1.0,1.7)    |
| PC.ae.C34.1  | 483 | 4.5 (3.7,5.8)    |
| PC.ae.C34.2  | 523 | 2.8 (2.1,3.5)    |
| PC.ae.C34.3  | 524 | 1.0 (0.7,1.2)    |
| PC.ae.C36.1  | 523 | 2.7 (2.2,3.3)    |
| PC.ae.C36.2  | 521 | 2.4 (1.9,2.9)    |
| PC.ae.C36.3  | 445 | 1.6 (1.2,2.1)    |
| PC.ae.C36.4  | 606 | 7.0 (5.4,8.6)    |
| PC.ae.C36.5  | 526 | 5.5 (4.2,7.0)    |
| PC.ae.C38.0  | 482 | 1.1 (0.8,1.4)    |
| PC.ae.C38.3  | 442 | 2.4 (1.8,3.0)    |
| PC.ae.C38.4  | 526 | 7.4 (5.8,9.0)    |
| PC.ae.C38.5  | 445 | 6.0 (4.8,7.5)    |
| PC.ae.C38.6  | 443 | 2.8 (2.1,3.5)    |
| PC.ae.C40.0  | 484 | 6.4 (4.9,7.9)    |
| PC.ae.C40.1  | 403 | 1.0 (0.5,1.4)    |
| PC.ae.C40.4  | 521 | 1.7 (1.3,2.2)    |
| PC.ae.C40.5  | 604 | 1.7 (1.3,2.3)    |
| PC.ae.C40.6  | 524 | 2.2 (1.7,2.8)    |
| PC.ae.C42.2  | 322 | 0.3 (0.2,0.4)    |
| PC.ae.C42.5  | 402 | 1.0 (0.8,1.4)    |
| PC.ae.C42.6  | 440 | 0.6 (0.4,0.9)    |
| SM.a.C32.1   | 525 | 2.7 (2.1,3.5)    |
| SM.a.C33.1   | 439 | 1.8 (1.4,2.3)    |
| SM.a.C34.0   | 443 | 3.4 (2.7,4.2)    |
| SM.a.C34.1   | 607 | 60.8 (47.2,80.5) |
| SM.a.C34.2   | 525 | 9.7 (7.6,12.3)   |
| SM.a.C35.1   | 364 | 1.5 (1.2,2.0)    |
| SM.a.C36.1   | 526 | 18.3 (14.3,22.4) |
| SM.a.C36.2   | 606 | 12.1 (8.9,15.4)  |
| SM.a.C38.1   | 324 | 15.6 (11.9,31.6) |
| SM.a.C38.2   | 523 | 14.2 (11.7,17.6) |
| SM.a.C39.1   | 477 | 1.3 (1.0,1.7)    |
| SM.a.C40.2   | 483 | 18.5 (14.0,26.5) |
| SM.a.C40.4   | 520 | 2.0 (1.4,2.9)    |
| SM.a.C41.1   | 364 | 3.9 (3.1,4.8)    |
| SM.a.C41.2   | 445 | 2.7 (2.1,3.4)    |
| SM.a.C42.1   | 425 | 23.9 (19.3,28.7) |
| SM.a.C42.2   | 605 | 31.7 (25.8,38.7) |
| SM.a.C42.3   | 605 | 19.1 (15.5,24.4) |
| SM.a.C42.6   | 359 | 3.6 (2.6,4.7)    |
| SM.a.C43.1   | 520 | 1.1 (0.8,1.4)    |
| SM.a.C44.1   | 305 | 0.6 (0.1,1.8)    |
| SM.a.C41.0   | 401 | 0.7 (0.4,1.7)    |
| SM.a.C47.5   | 481 | 0.0 (0.0,0.0)    |
| SM.a.C47.6   | 314 | 0.0 (0.0,0.0)    |
| NEFA 10_0    | 526 | 0.9 (0.5,1.3)    |
| NEFA 12_0    | 605 | 1.9 (1.2,2.8)    |
| NEFA 14_1    | 524 | 1.1 (0.5,1.7)    |

|                |     |                  |
|----------------|-----|------------------|
| NEFA 15_0      | 587 | 0.3 (0.1,0.5)    |
| NEFA 15_1      | 371 | 0.0 (0.0,0.0)    |
| NEFA 16_0      | 607 | 61.8 (42.9,85.4) |
| NEFA 16_1      | 607 | 4.2 (2.7,6.9)    |
| NEFA 17_0      | 607 | 2.0 (1.5,2.5)    |
| NEFA 17_1      | 526 | 0.5 (0.4,0.8)    |
| NEFA 18_1      | 607 | 51.3 (35.2,73.4) |
| NEFA 18_2      | 524 | 16.4 (10.8,25.8) |
| NEFA 18_3      | 583 | 1.1 (0.7,1.9)    |
| NEFA 20_0      | 481 | 0.4 (0.3,0.5)    |
| NEFA 20_1      | 604 | 0.6 (0.4,0.9)    |
| NEFA 20_2      | 526 | 0.7 (0.5,0.9)    |
| NEFA 20_3      | 607 | 1.5 (1.1,2.2)    |
| NEFA 20_4      | 606 | 2.3 (1.6,3.6)    |
| NEFA 22_0      | 526 | 0.2 (0.1,0.2)    |
| NEFA 22_1      | 597 | 0.1 (0.1,0.2)    |
| NEFA 22_2      | 596 | 0.1 (0.1,0.1)    |
| NEFA 22_6      | 521 | 3.2 (2.2,4.6)    |
| NEFA 24_1      | 598 | 0.4 (0.3,0.6)    |
| NEFA 19_0      | 441 | 0.4 (0.3,0.5)    |
| NEFA 19_1      | 523 | 0.3 (0.2,0.4)    |
| NEFA 20_5      | 451 | 0.1 (0.0,0.2)    |
| NEFA 22_3      | 402 | 0.3 (0.2,0.4)    |
| NEFA 22_4      | 599 | 0.7 (0.5,1.0)    |
| NEFA 22_5      | 599 | 0.6 (0.4,0.9)    |
| NEFA 24_0      | 517 | 0.2 (0.1,0.2)    |
| NEFA 24_2      | 323 | 0.1 (0.1,0.2)    |
| NEFA 24_4      | 601 | 0.2 (0.2,0.3)    |
| NEFA 24_5      | 524 | 0.2 (0.1,0.2)    |
| NEFA 24_6      | 402 | 0.0 (0.0,0.1)    |
| NEFA 26_0      | 356 | 0.0 (0.0,0.1)    |
| NEFA 26_1      | 479 | 0.1 (0.1,0.1)    |
| NEFA 26_2      | 517 | 0.1 (0.1,0.1)    |
| NEFA 26_3      | 440 | 0.1 (0.1,0.1)    |
| NEFA 26_4      | 519 | 0.2 (0.1,0.2)    |
| NEFA 26_6      | 359 | 0.1 (0.1,0.1)    |
| Carn           | 525 | 17.3 (14.3,21.6) |
| Carn.a.C10.0   | 525 | 0.1 (0.1,0.1)    |
| Carn.a.C10.1   | 525 | 0.1 (0.1,0.2)    |
| Carn.a.C12.0   | 524 | 0.1 (0.0,0.1)    |
| Carn.a.C12.1   | 442 | 0.1 (0.1,0.2)    |
| Carn.a.C14.0   | 606 | 0.1 (0.0,0.1)    |
| Carn.a.C14.1   | 525 | 0.1 (0.1,0.1)    |
| Carn.a.C15.0   | 401 | 0.0 (0.0,0.0)    |
| Carn.a.C16.0   | 602 | 0.1 (0.1,0.2)    |
| Carn.a.C16.1   | 605 | 0.1 (0.1,0.1)    |
| Carn.a.C18.0   | 442 | 0.0 (0.0,0.0)    |
| Carn.a.C18.1   | 604 | 0.1 (0.1,0.2)    |
| Carn.a.C18.2   | 357 | 0.1 (0.1,0.3)    |
| Carn.a.C2.0    | 525 | 5.1 (3.9,7.0)    |
| Carn.a.C20.0   | 397 | 0.0 (0.0,0.0)    |
| Carn.a.C20.4   | 304 | 0.0 (0.0,0.0)    |
| Carn.a.C3.0    | 605 | 0.4 (0.3,0.6)    |
| Carn.a.C3.0.DC | 444 | 0.3 (0.2,0.9)    |

|                              |     |                         |
|------------------------------|-----|-------------------------|
| Carn.a.C4.0                  | 605 | 0.2 (0.1,0.2)           |
| Carn.a.C4.0.DC               | 442 | 0.0 (0.0,0.0)           |
| Carn.a.C5.0                  | 606 | 0.1 (0.1,0.2)           |
| Carn.a.C6.0                  | 606 | 0.1 (0.1,0.1)           |
| Carn.a.C8.0                  | 444 | 0.1 (0.1,0.1)           |
| Carn.a.C8.1                  | 526 | 0.1 (0.1,0.1)           |
| Carn.a.C9.0                  | 441 | 0.0 (0.0,0.0)           |
| Pyruvic.acid                 | 605 | 15.5 (11.2,22.5)        |
| Lactic.acid                  | 605 | 27.7 (20.1,41.2)        |
| Fumaric.acid                 | 605 | 47.3 (36.2,64.4)        |
| X3.Methyl.2.oxobutanoic.acid | 606 | 240.5 (115.0,466.0)     |
| Succinic.acid                | 606 | 5600.0 (3210.0,10200.0) |
| Methyl.Malonic.acid          | 605 | 1.6 (1.2,2.3)           |
| Taurine                      | 605 | 6.5 (4.9,9.5)           |
| X3.Methyl.2.oxovalveric.acid | 603 | 0.3 (0.3,0.4)           |
| X4.Methyl.2.oxovalveric.acid | 605 | 121.0 (86.8,173.0)      |
| Malic.acid                   | 604 | 7.1 (5.4,10.7)          |
| Alpha.Ketoglutaric.acid      | 605 | 4.3 (3.0,6.2)           |
| Alpha.Aminoadipic.acid       | 604 | 0.7 (0.5,0.9)           |
| Isocitric.acid               | 604 | 21.2 (17.4,25.5)        |
| Citric.acid                  | 604 | 114.0 (96.5,133.0)      |
| Beta.Hydroxybutyric.acid     | 524 | 138.0 (63.5,240.0)      |
| Ala                          | 605 | 454.0 (367.0,555.0)     |
| Arg                          | 606 | 36.0 (21.5,52.1)        |
| Asn                          | 605 | 41.5 (33.2,52.6)        |
| Asp                          | 605 | 13.8 (9.0,22.1)         |
| Cit                          | 606 | 13.8 (10.7,17.3)        |
| Gln                          | 605 | 400.0 (322.0,497.0)     |
| Glu                          | 601 | 106.0 (78.1,149.0)      |
| Gly                          | 604 | 276.5 (231.0,327.0)     |
| His                          | 603 | 154.0 (125.0,188.0)     |
| Ile                          | 602 | 61.3 (50.0,77.1)        |
| Leu                          | 606 | 107.5 (92.3,128.0)      |
| Lys                          | 606 | 230.0 (193.0,288.0)     |
| Met                          | 606 | 28.3 (23.4,35.4)        |
| Orn                          | 511 | 108.0 (85.0,132.0)      |
| Phe                          | 606 | 82.8 (70.3,96.7)        |
| Pro                          | 485 | 186.0 (156.0,243.0)     |
| Trp                          | 605 | 49.2 (40.3,59.9)        |
| Ser                          | 484 | 98.0 (79.5,123.0)       |
| Thr                          | 562 | 202.5 (162.0,253.0)     |
| Tyr                          | 606 | 58.8 (49.3,73.2)        |
| Val                          | 606 | 204.0 (176.0,250.0)     |
| Cys                          | 483 | 14.0 (11.4,17.2)        |

**Supplement Table 3: Summary statistics of the cord blood metabolic profile including candidate biomarkers and metabolome from obese pregnant women included in the UPBEAT trial (n=607)**

*Abbreviations; CARN-Carnitines; HDL-High density lipoprotein; IGFI- Insulin growth factor I; IGF II- Insulin growth factor II; IL6- Interleukin 6; LPC- lysophosphatidylcholines; LPCE- lysophosphatidylethanolamine; PC- phosphatidylcholines; PCA- diacylphosphatidylcholines; PCE- acylalkylphosphatidylcholines; SM- sphingomyelins; TNFalpha- Tumor necrosis factor; X30B- x3methyl2oxobutanoicacid; X30V- 3methyl2oxovalvericacid; X40B- 4methyl2oxovalvericacid.*



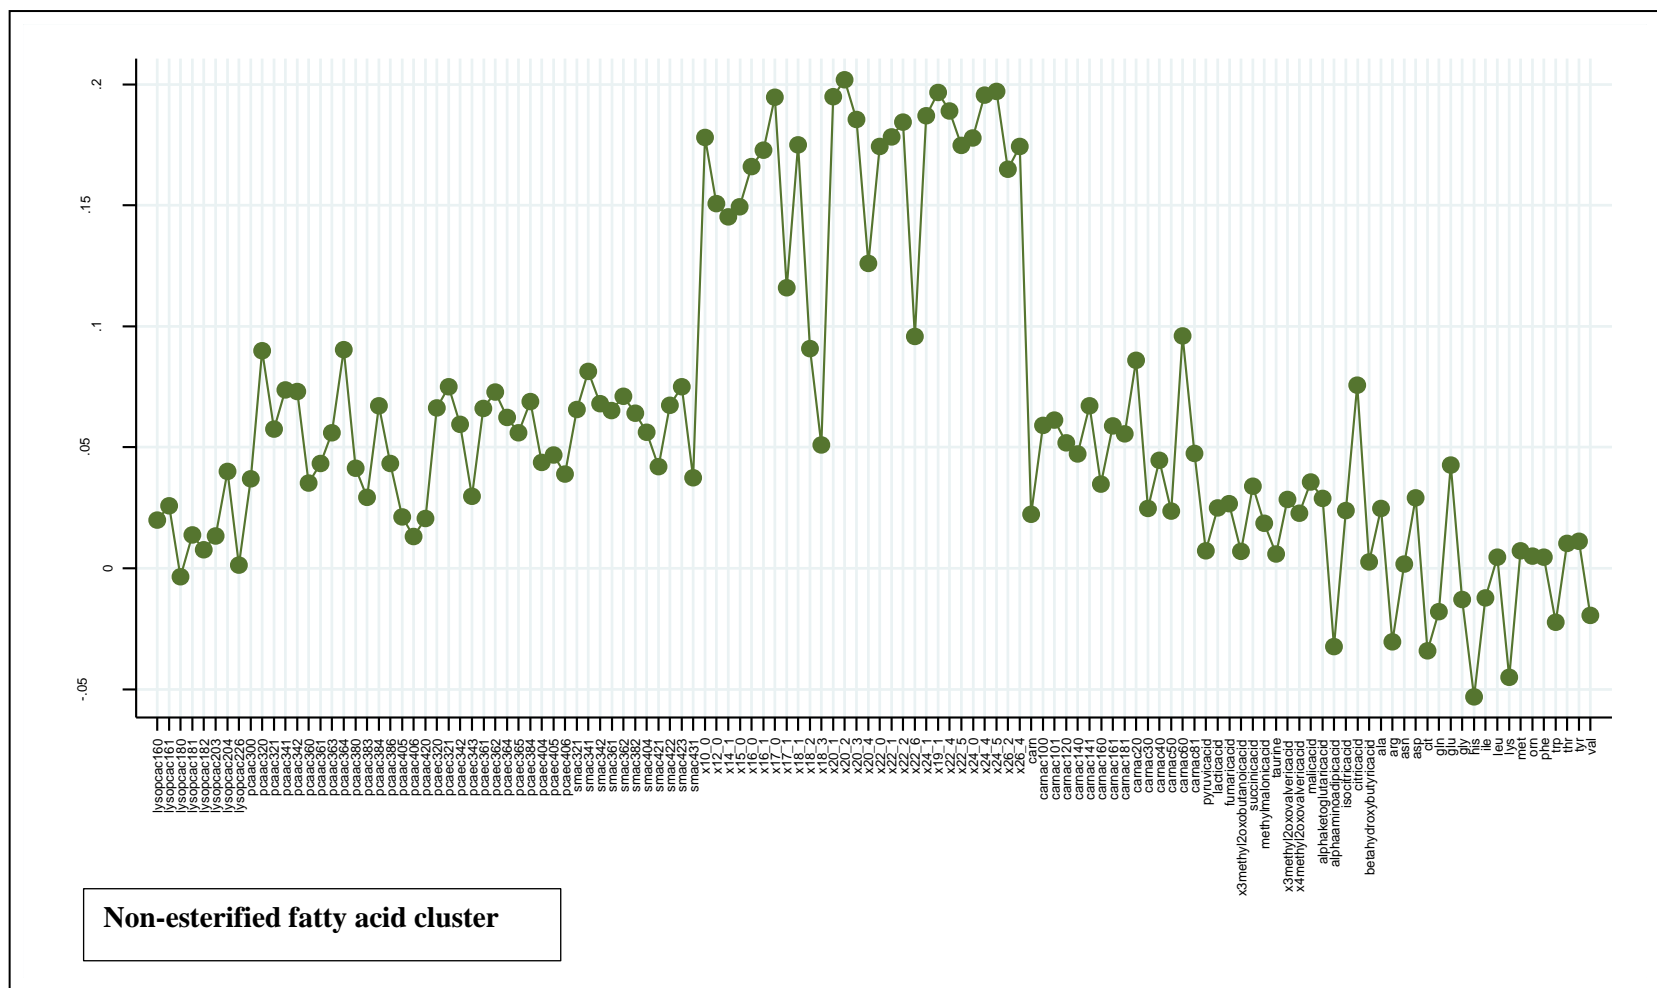

**Supplement Figure 3b: Graphical representation of non-esterified fatty acid cluster derived from principal component analysis of the cord blood metabolomic profile from infants born to obese pregnant women (N=609).**





|                           | Included<br>N=607 | Excluded<br>N=947  | Comparison<br>(95% CI) | p-value |
|---------------------------|-------------------|--------------------|------------------------|---------|
| Maternal age              | 30.97 (5.39)      | 30.17 (5.58)       | 0.81 (0.25 to 1.36)    | 0.005   |
| Multiparity               | 318 (52.4%)       | 562 (59.3%)        | 0.75 (0.61 to 0.93)    | 0.007   |
| BMI (kg/m <sup>2</sup> )  | 36.52 (4.93)      | 36.15 (4.66)       | 0.37 (-0.12 to 0.86)   | 0.138   |
| Socioeconomic deprivation | 341 (80.0%)       | N=822; 666 (80.6%) | 0.96 (0.72 to 1.29)    | 0.806   |
| White ethnicity           | 433 (71.6)        | 524 (57.3)         | 1.25 (1.16 to 1.35)    | <0.001  |
| Black ethnicity           | 116 (19.1%)       | 272 (29.8%)        | 0.56 (0.43 to 0.71)    | <0.001  |
| Asian ethnicity           | 29 (4.8%)         | 62/ (6.8%)         | 0.69 (0.44 to 1.08)    | 0.107   |
| Other ethnicity           | 28 (4.6%)         | 56 (6.1%)          | 0.74 (0.46 to 1.18)    | 0.205   |
| Smoker in early pregnancy | 33 (6.4)          | 66(7.2)            | 0.88 (0.58 to 1.33)    | 0.545   |

**Supplement Table 4: Baseline differences in maternal baseline demographic characteristics of those included versus those excluded in the analyses to assess the effect of the UPBEAT intervention on the cord blood metabolic profile.**





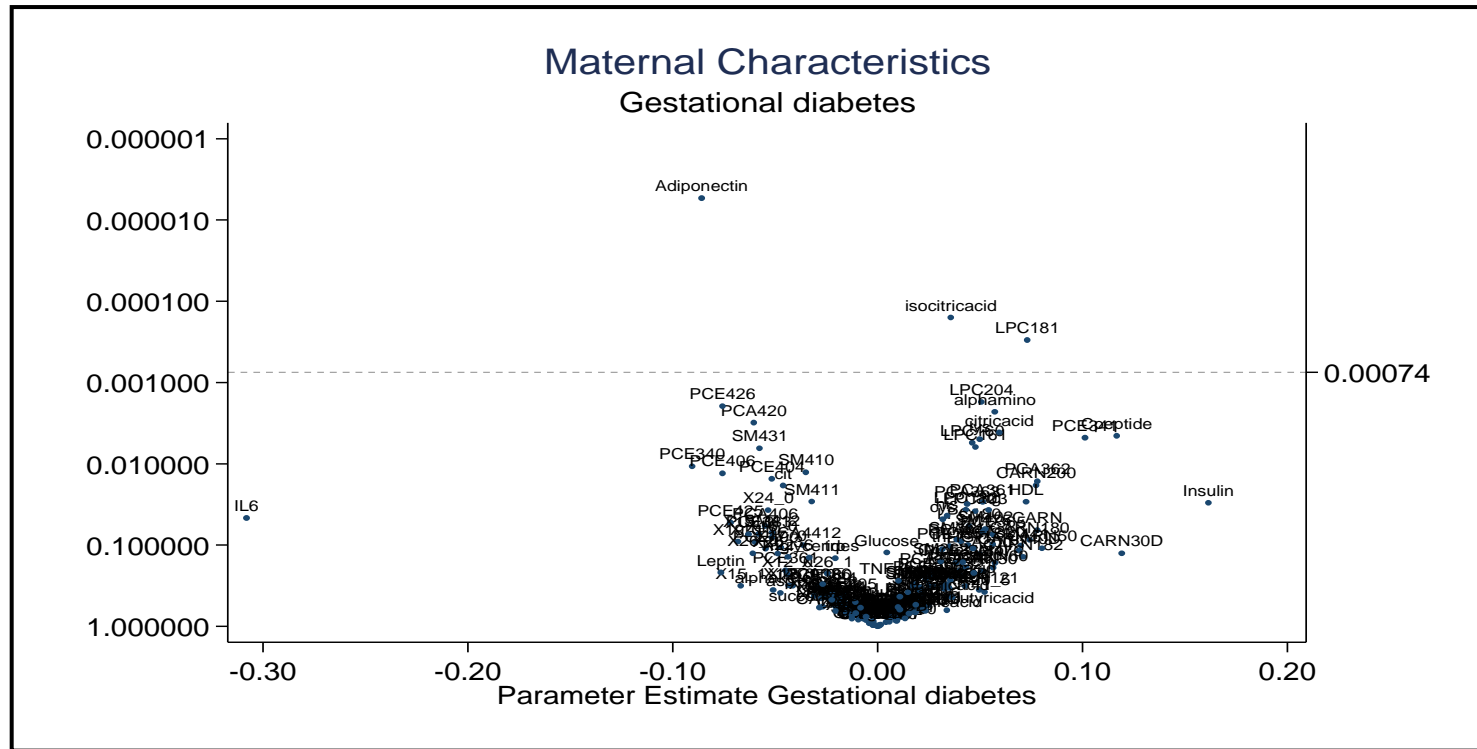

**Supplement Figure 5: Volcano plot demonstrating the association of maternal gestational diabetes with cord blood metabolic profile in infants born to obese pregnant women (n=607).**

Parameter estimates are graphically represented for each biochemical variable in relation to maternal clinical characteristics following adjustment using a false discovery rate (Benjamin & Hochberg procedure) (17). Statistical significance  $p < 0.00074$ . Abbreviations; CARN-Carnitines; HDL-High density lipoprotein; IGFI- Insulin growth factor I; IGF II- Insulin growth factor II; IL6- Interleukin 6; LPC- lysophosphatidylcholines; LPCE- lysophosphatidylethanolamine; PC-phosphatidylcholines; PCA- diacylphosphatidylcholines; PCE- acylalkylphosphatidylcholines; SM- sphingomyelins. TNFalpha- Tumor necrosis factor; X30B- x3methyl2oxobutanoicacid; X30V-- x4methyl2oxovalericacid. NEFAs are described using the nomenclature CX:Y, where X is the length of the carbon chain, Y is the number of double bonds, OH in the formula means the molecule contains a hydroxyl-group.



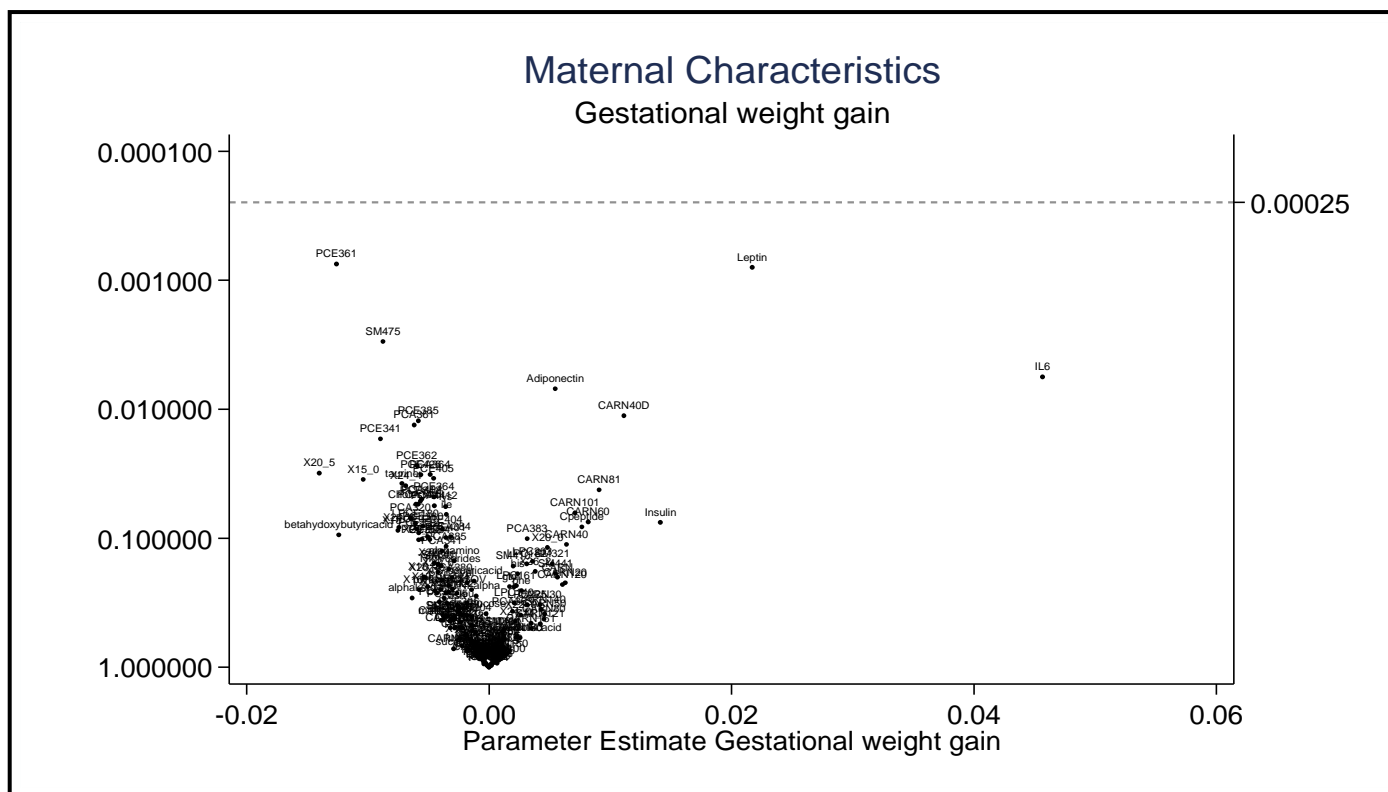

**Supplement Figure 7: Volcano plot demonstrating the association of maternal gestational weight gain with cord blood metabolic profile in infants born to obese pregnant women (n=607).**

Parameter estimates are graphically represented for each biochemical variable in relation to maternal clinical characteristics following adjustment using a false discovery rate (Benjamin & Hochberg procedure) (17). Statistical significance  $p < 0.00025$ . Abbreviations; CARN-Carnitines; HDL-High density lipoprotein; IGF I- Insulin growth factor I; IGF II- Insulin growth factor II; IL6- Interleukin 6; LPC- lysophosphatidylcholines; LPCE- lysophosphatidylethanolamine; PC-phosphatidylcholines; PCA- diacylphosphatidylcholines; PCE- acylalkylphosphatidylcholines; SM- sphingomyelins. TNFalpha- Tumor necrosis factor; X30B- x3methyl2oxobutanoicacid; X30V-- x4methyl2oxovalvericacid. NEFAs are described using the nomenclature CX:Y, where X is the length of the carbon chain, Y is the number of double bonds, OH in the formula means the molecule contains a hydroxyl-group.

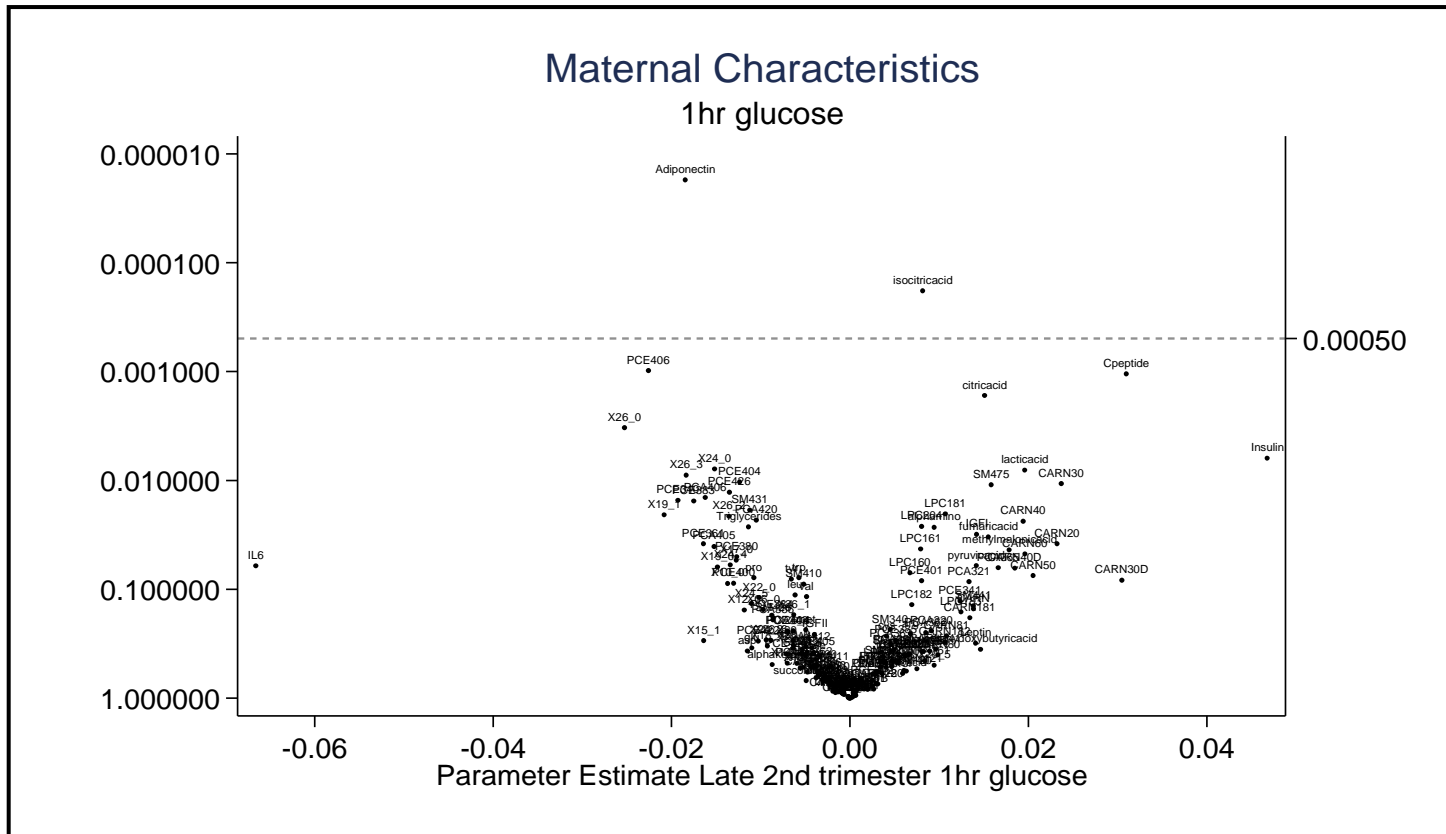

**Supplement Figure 8: Volcano plot demonstrating the association of maternal glucose at 1 hour at the time of the oral glucose tolerance test with cord blood metabolic profile in infants born to obese pregnant women (n=607).**

Parameter estimates are graphically represented for each biochemical variable in relation to maternal clinical characteristics following adjustment using a false discovery rate (Benjamin & Hochberg procedure) (17). Statistical significance  $p < 0.005$ . Abbreviations; CARN-Carnitines; HDL-High density lipoprotein; IGF I- Insulin growth factor I; IGF II- Insulin growth factor II; IL6- Interleukin 6; LPC- lysophosphatidylcholines; LPCE- lysophosphatidylethanolamine; PC-phosphatidylcholines; PCA- diacylphosphatidylcholines; PCE- acylalkylphosphatidylcholines; SM- sphingomyelins. TNFalpha- Tumor necrosis factor; X30B- x3methyl2oxobutanoicacid; X30V-- x4methyl2oxovalericacid. NEFAs are described using the nomenclature CX:Y, where X is the length of the carbon chain, Y is the number of double bonds, OH in the formula means the molecule contains a hydroxyl-group.



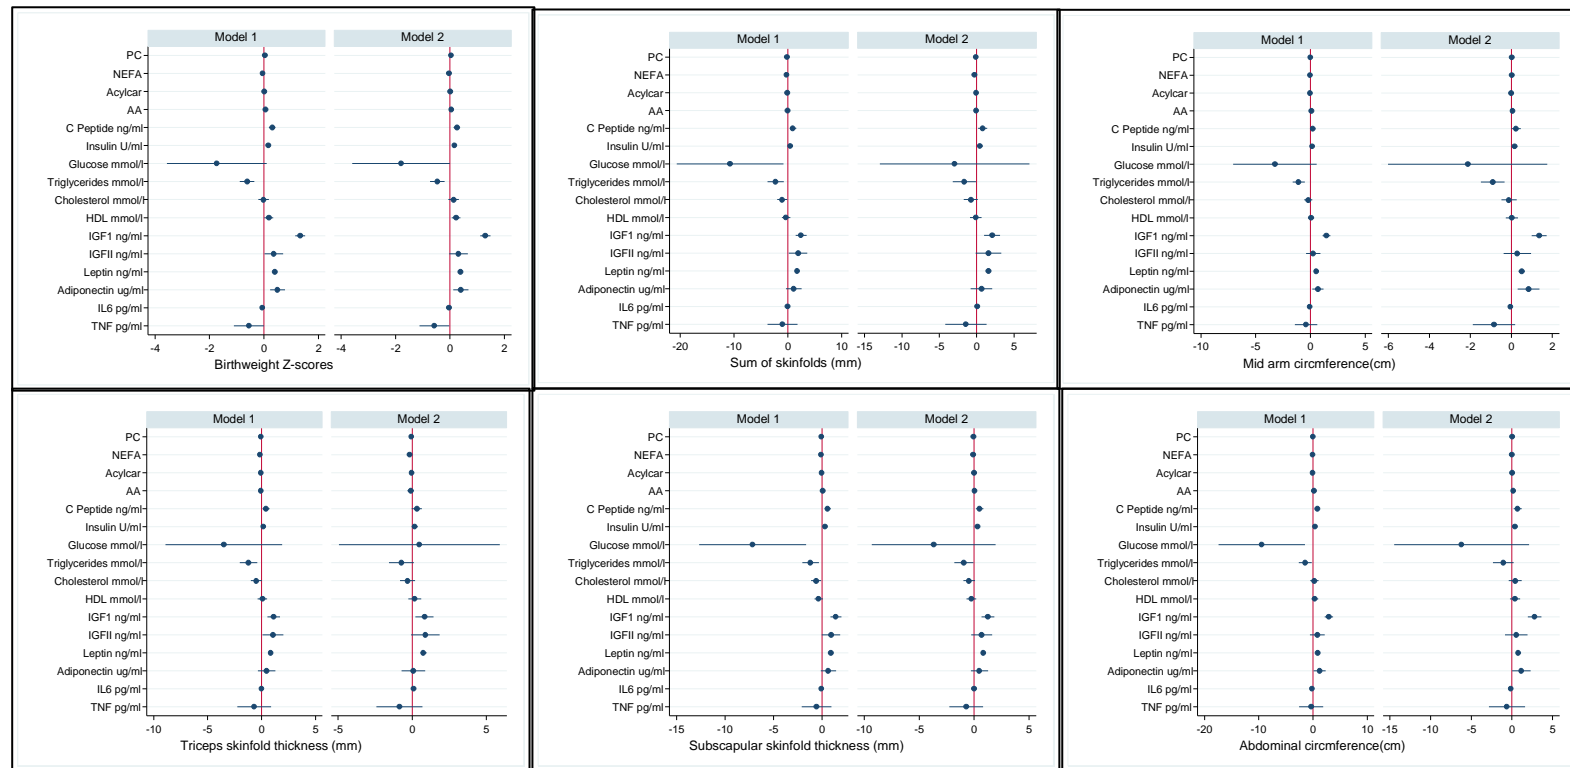

**Supplement Figure 10: Associations of the cord blood metabolic profile with neonatal anthropometry in infants born to obese pregnant women (n=344)**

Regression coefficients graphically presented with corresponding 95% confidence intervals. Model 1: Adjustment made for offspring sex, gestation at delivery and randomisation to the UPBEAT intervention. Model 2: Adjustment made for maternal parity, ethnicity, and smoker in early pregnancy, gestational diabetes, gestational weight gain, offspring sex, gestation at delivery, randomisation to UPBEAT Intervention. Abbreviations; HDL- High density lipoprotein; IGF1- Insulin growth factor I; IGFII- Insulin growth factor II; IL6-Interleukin 6; MUAC-Mid upper arm circumference; SDS- Standard deviation scores; SFT- skinfold thickness; TNFalpha- Tumour Necrosis Factor alpha.

|                                       | Weight z-scores<br>(n=247) | Length z-score<br>(n=238) | BMI z-score (n=238)         | MUAC z-score<br>(n=246)  | Triceps SFT z-<br>score (n=242) | Subscapular SFT z-<br>score (n=209) |
|---------------------------------------|----------------------------|---------------------------|-----------------------------|--------------------------|---------------------------------|-------------------------------------|
|                                       | Coef (95% CI)              | Coef (95% CI)             | Coef (95% CI)               | Coef (95% CI)            | Coef (95% CI)                   | Coef (95% CI)                       |
| PCA-Phosphatidylcholines              | 0.05 (0.00 to 0.10) *      | 0.07 (0.01 to 0.13) *     | 0.01 (-0.04 to 0.07)        | 0.04 (0.00 to 0.08)      | 0.05 (-0.02 to 0.13)            | -0.03 (-0.11 to 0.05)               |
| PCA-NEFA                              | -0.03 (-0.09 to 0.04)      | -0.02 (-0.10 to 0.06)     | -0.02 (-0.09 to 0.05)       | -0.05 (-0.10 to 0.01)    | -0.04 (-0.15 to 0.08)           | 0.01 (-0.11 to 0.14)                |
| Cpeptide (log <sub>2</sub> ) ng/ml    | 0.00 (-0.023 to 0.23)      | -0.18 (-0.59 to 0.24)     | 0.14 (-0.30 to 0.58)        | 0.08 (-0.32 to 0.49)     | 0.32 (-0.03 to 0.67)            | 0.21 (-0.13 to 0.56)                |
| Insulin (log <sub>2</sub> ) U/ml      | 0.07 (-0.05 to 0.20)       | -0.10 (-0.33 to 0.13)     | 0.19 (-0.06 to 0.43)        | 0.06 (-0.16 to 0.28)     | -0.01 (-0.20 to 0.19)           | 0.02 (-0.18 to 0.22)                |
| Glucose (log <sub>2</sub> ) mmol/l    | -0.80 (-4.29 to 2.69)      | 0.28 (-6.16 to 6.71)      | -1.64 (-8.38 to 5.10)       | 1.19 (-4.95 to 7.32)     | 1.35 (-4.13 to 6.82)            | -0.49 (-6.13 to 5.15)               |
| Triglycerides mmol/l                  | -0.30 (-0.83 to 0.24)      | 0.37 (-0.64 to 1.38)      | -0.89 (-1.95 to 0.18)       | -1.05 (-2.01 to -0.08) * | -0.39 (-1.22 to 0.44)           | -0.34 (-1.20 to 0.53)               |
| HDL mmol/l                            | 0.18 (-0.10 to 0.47)       | 0.20 (-0.32 to 0.72)      | 0.07 (-0.48 to 0.61)        | 0.35 (-0.15 to 0.85)     | 0.26 (-0.18 to 0.69)            | 0.20 (-0.23 to 0.63)                |
| IGFI (log <sub>2</sub> ) ng/ml        | 0.45 (0.11 to 0.79) *      | -0.12 (-0.75 to 0.51)     | 0.87 (0.22 to 1.53)         | 0.64 (0.04 to 1.24) *    | -0.04 (-0.59 to 0.50)           | 0.07 (-0.46 to 0.61)                |
| Leptin (log <sub>2</sub> ) ng/ml      | -0.05 (-0.21 to 0.10)      | 0.09 (-0.19 to 0.37)      | -0.21 (-0.50 to 0.08)       | -0.27 (-0.53 to 0.00) *  | 0.00 (-0.23 to 0.24)            | 0.12 (-0.11 to 0.35)                |
| Adiponectin (log <sub>2</sub> ) up/ml | 0.82 (0.30 to 1.33) **     | 0.98 (0.05 to 1.92) *     | 0.18 (-0.81 to 1.17)        | 0.34 (-0.56 to 1.24)     | 0.72 (-0.07 to 1.52)            | 1.00 (0.20 to 1.80) *               |
| IL6 (log <sub>2</sub> ) pg/ml         | -0.03 (-0.09 to 0.04)      | 0.06 (-0.05 to 0.18)      | -0.09 (-0.21 to 0.03)       | -0.09 (-0.19 to 0.02)    | -0.05 (-0.14 to 0.04)           | -0.09 (-0.18 to 0.00)               |
| TNF alpha (log <sub>2</sub> ) pg/ml   | -0.20 (-1.22 to 0.81)      | 1.51 (-0.33 to 3.35)      | -1.99 (-3.92 to -0.06)<br>* | -0.46 (-2.23 to 1.31)    | -0.58 (-2.13 to 0.97)           | 0.90 (-0.63 to 2.43)                |

**Supplement Table 5: Associations between candidate biomarkers and metabolite clusters from cord blood samples with infant anthropometry at 6 months; data from the UPBEAT study (n=209).**

Regression coefficients with corresponding 95% confidence intervals presented are adjusted for maternal parity, ethnicity, smoker in early pregnancy, gestational diabetes, gestational weight gain, offspring sex, gestation at delivery, randomisation to UPBEAT Intervention and mode of early life feeding. Abbreviations; HDL- High density lipoprotein; IGFI- Insulin growth factor I; IL6-Interleukin 6; MUAC-Mid upper arm circumference; NEFA-non-esterified fatty acids; SDS- Standard deviation scores; SFT- skinfold thickness; TNFalpha- Tumour Necrosis Factor alpha. \* $p < 0.05$ ; \*\* $p < 0.001$ .



|                                       | Catch up growth (n=246) ^ | Catch down growth(n=246)<br>^^ |
|---------------------------------------|---------------------------|--------------------------------|
|                                       | Odds ratio (95% CI)       | Odds ratio (95% CI)            |
| PCA-Phosphatidylcholines              | 1.35 (1.04 to 1.75) *     | 1.03 (0.86 to 1.22)            |
| PCA-NEFAs                             | 1.34 (0.93 to 1.93)       | 1.07 (0.82 to 1.39)            |
| Cpeptide (log <sub>2</sub> ) ng/ml    | 0.50 (0.24 to 1.05)       | 1.22 (0.58 to 2.58)            |
| Insulin (log <sub>2</sub> ) U/ml      | 0.72 (0.48 to 1.06)       | 1.10 (0.74 to 1.65)            |
| Glucose (log <sub>2</sub> ) mmol/l    | 0.04 (0.00 to 55.03)      | 0.00 (0.00 to 14.21)           |
| Triglycerides mmol/l                  | 1.48 (0.29 to 7.62)       | 0.54 (0.10 to 3.06)            |
| HDL mmol/l                            | 2.21 (0.93 to 5.26)       | 1.59 (0.67 to 3.76)            |
| IGFI (log <sub>2</sub> ) ng/ml        | 0.40 (0.14 to 1.16)       | 5.00 (1.62 to 15.21) *         |
| Leptin (log <sub>2</sub> ) ng/ml      | 0.30 (0.17 to 0.52) **    | 2.26 (1.37 to 3.75) **         |
| Adiponectin (log <sub>2</sub> ) ug/ml | 0.20 (0.04 to 1.06)       | 1.32 (0.27 to 6.89)            |
| IL6 (log <sub>2</sub> ) pg/ml         | 0.94 (0.78 to 1.13)       | 0.95 (0.79 to 1.14)            |
| TNF alpha (log <sub>2</sub> ) pg/ml   | 1.44 (0.06 to 35.12)      | 0.20 (0.01 to 5.10)            |

**Supplement Table 6: Associations between candidate biomarkers and metabolite clusters from cord blood samples and early infant growth velocities; data from the UPBEAT study (n=246).**

*Odds ratio with corresponding 95% confidence intervals presented are adjusted for maternal parity, ethnicity, smoker in early pregnancy, gestational diabetes, gestational weight gain, offspring sex, gestation at delivery, randomisation to UPBEAT Intervention and mode of early life feeding. Abbreviations; HDL- High density lipoprotein; IGFI- Insulin growth factor I; IL6-Interleukin 6; MUAC-Mid upper arm circumference; NEFA-non-esterified fatty acids; SDS- Standard deviation scores; SFT- skinfold thickness; TNFalpha- Tumour Necrosis Factor alpha. \*p<0.05; \*\* p<0.001. ^ Catch up growth defined as an increase  $\geq 0.67$ SDs in weight-z-scores from birth to 6 months of age using the WHO reference population (18). ^^ Catch down growth defined as a decrease  $\leq 0.67$ SDs in weight-z-scores from birth to 6 months of age using the WHO reference population (18)*

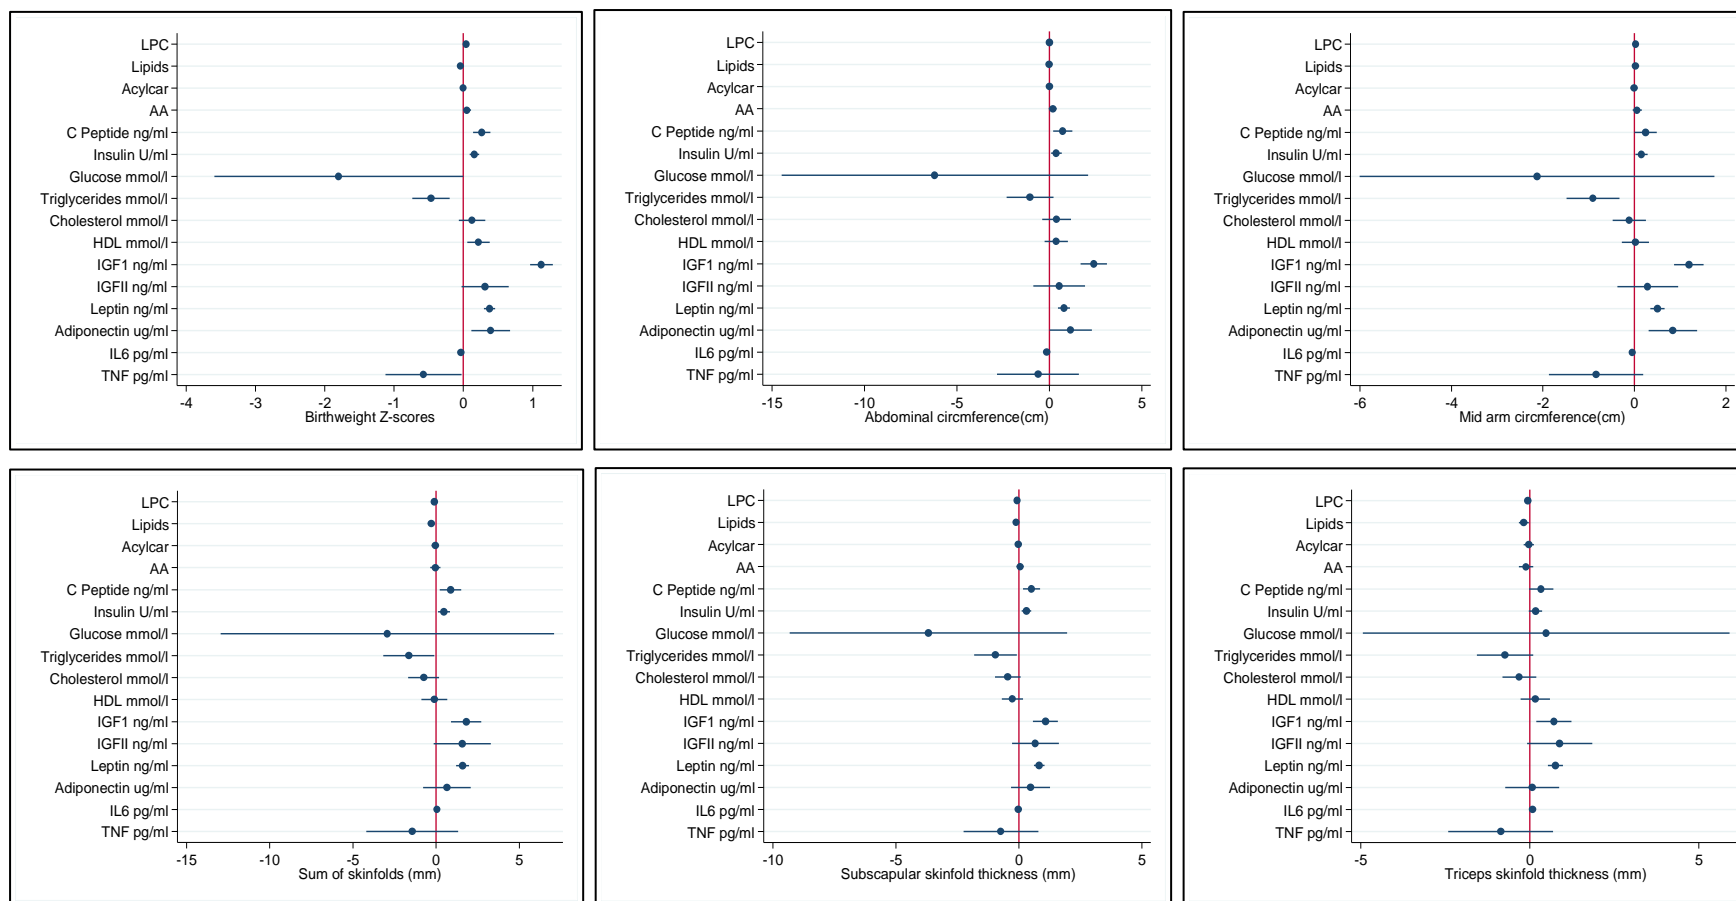

**Supplement Figure 11: Sensitivity analyses following exclusion of offspring born <34 weeks' gestation demonstrating no differences in the associations between cord blood metabolic profile and neonatal anthropometry (excluded n= 36).**

Regression coefficients graphically presented with corresponding 95% confidence intervals. Model 1: Adjustment made for offspring sex, gestation at delivery and randomisation to the UPBEAT intervention. Model 2: Adjustment made for maternal parity, ethnicity, and smoker in early pregnancy, gestational diabetes, gestational weight gain, offspring sex, gestation at delivery, randomisation to UPBEAT Intervention. Abbreviations; AA-amino acids; Acylcar- Long chain acylcarnitines and TCA metabolites; HDL- High density lipoprotein; IGF1- Insulin growth factor I; IGFII- Insulin growth factor II; IL6-Interleukin 6; MUAC-Mid upper arm circumference; NEFA-Non-esterified fatty acid; PC-phosphatidylcholine; SDS- Standard deviation scores; SFT- skinfold thickness; TNFalpha- Tumour Necrosis Factor alpha

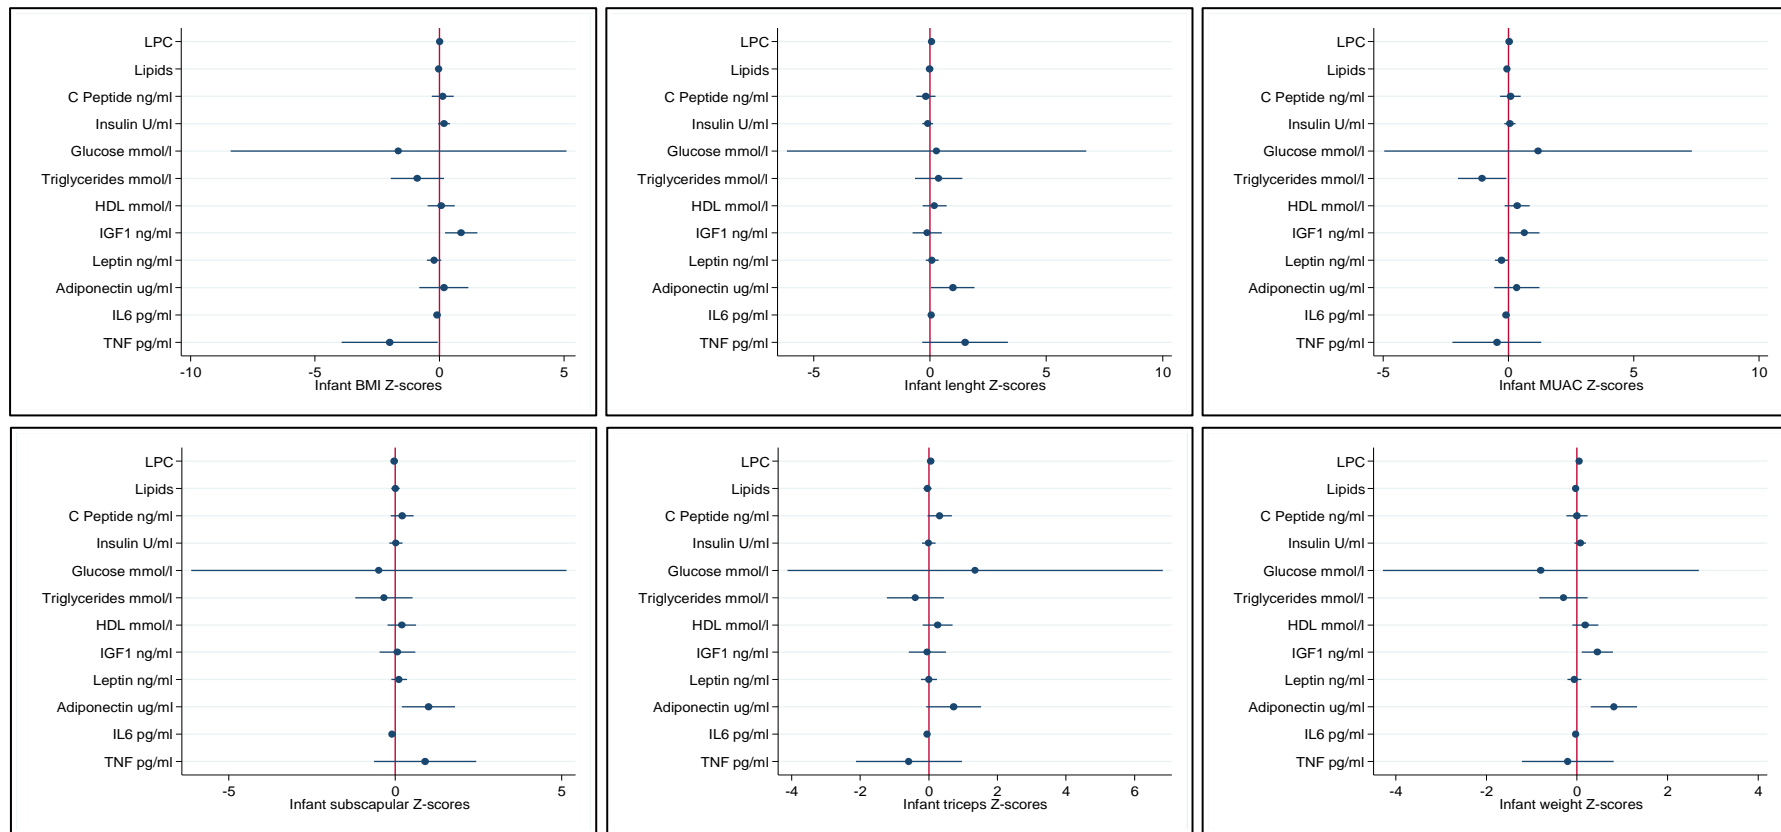

**Supplement Figure 12: Sensitivity analyses following exclusion of offspring born <34 weeks' gestation demonstrating no differences in the associations between cord blood metabolic profile and infant anthropometry at 6 months of age (excluded n=36).**

*Regression coefficients with corresponding 95% confidence intervals presented are adjusted for maternal parity, ethnicity, smoker in early pregnancy, gestational diabetes, gestational weight gain, offspring sex, gestation at delivery, randomisation to UPBEAT Intervention and mode of early life feeding. Abbreviations; HDL- High density lipoprotein; IGF1- Insulin growth factor I; IL6-Interleukin 6; MUAC-Mid upper arm circumference; NEFA-Non-esterified fatty acid; PC-phosphatidylcholine; SDS- Standard deviation scores; SFT- skinfold thickness; TNFalpha-Tumour Necrosis Factor alpha. \*p<0.05; \*\* p<0.001.*

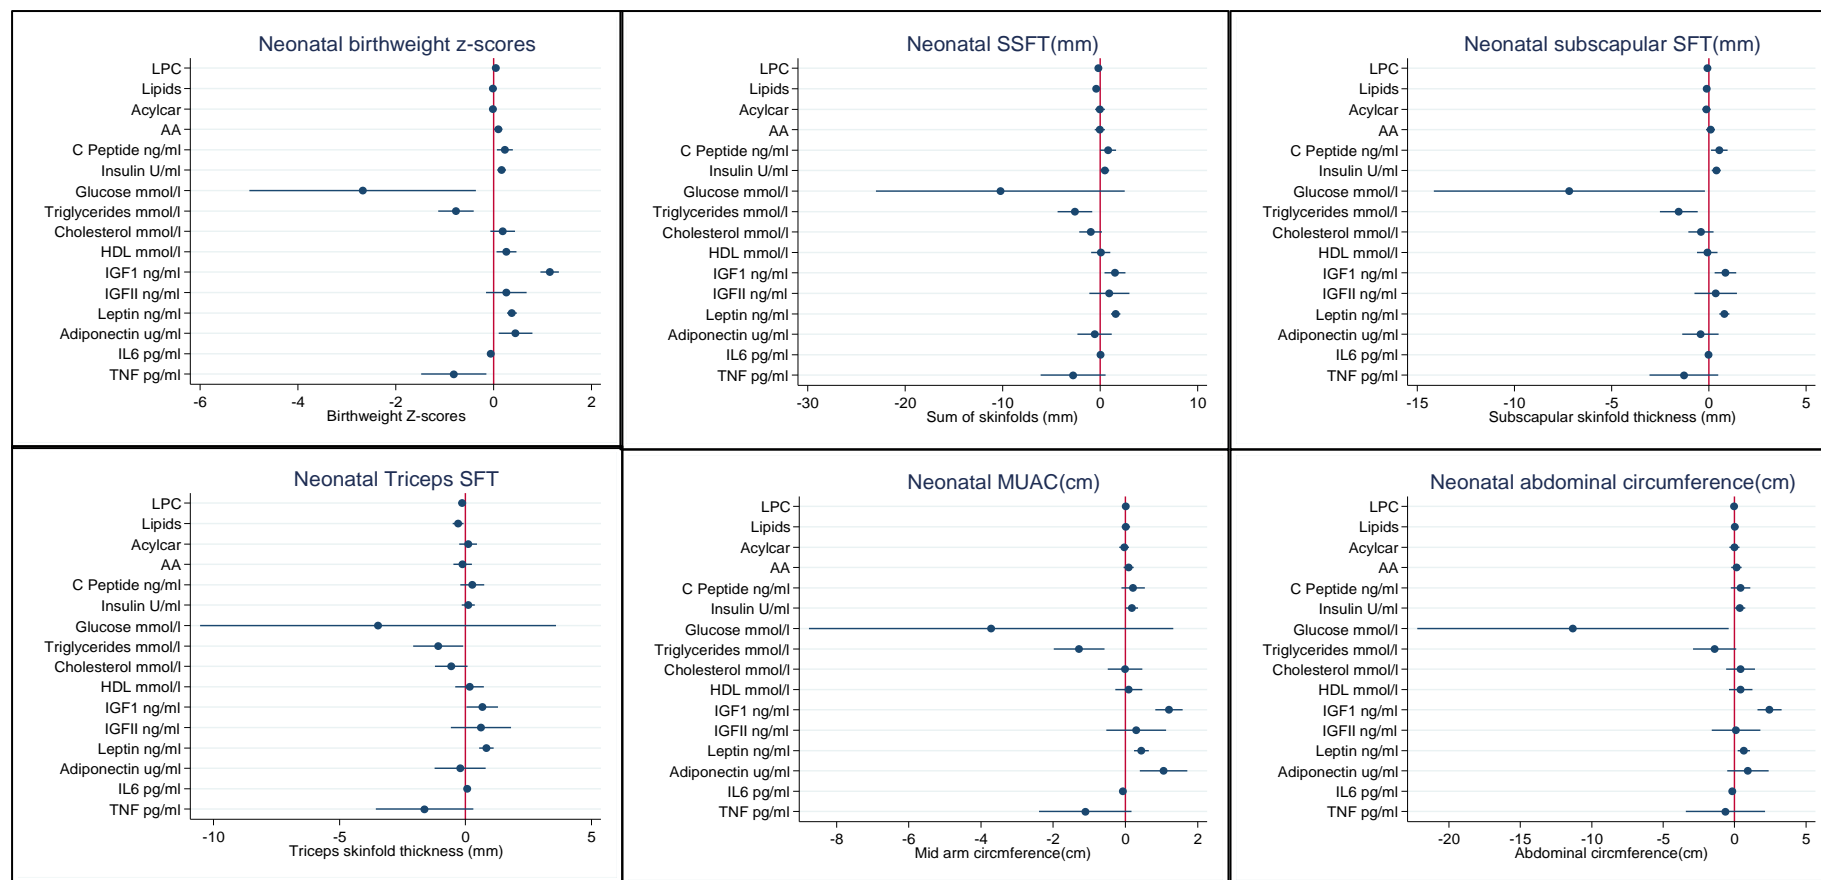

**Supplement Figure 13: Sensitivity analyses of associations between cord blood metabolic profile and neonatal anthropometry, following exclusion of neonates exposed to gestational diabetes in-utero excluded n=111).**

Regression coefficients graphically presented with corresponding 95% confidence intervals. Model 1: Adjustment made for offspring sex, gestation at delivery and randomisation to the UPBEAT intervention. Model 2: Adjustment made for maternal parity, ethnicity, and smoker in early pregnancy, gestational diabetes, gestational weight gain, offspring sex, gestation at delivery, randomisation to UPBEAT Intervention. Abbreviations; AA-amino acids; Acylcar- Long chain acylcarnitines and TCA metabolites; HDL- High density lipoprotein; IGF1- Insulin growth factor I; IGFII- Insulin growth factor II; IL6-Interleukin 6; MUAC-Mid upper arm circumference; NEFA-Non-esterified fatty acid; PC-phosphatidylcholine; SDS- Standard deviation scores; SFT- skinfold thickness; TNFalpha- Tumour Necrosis Factor alpha

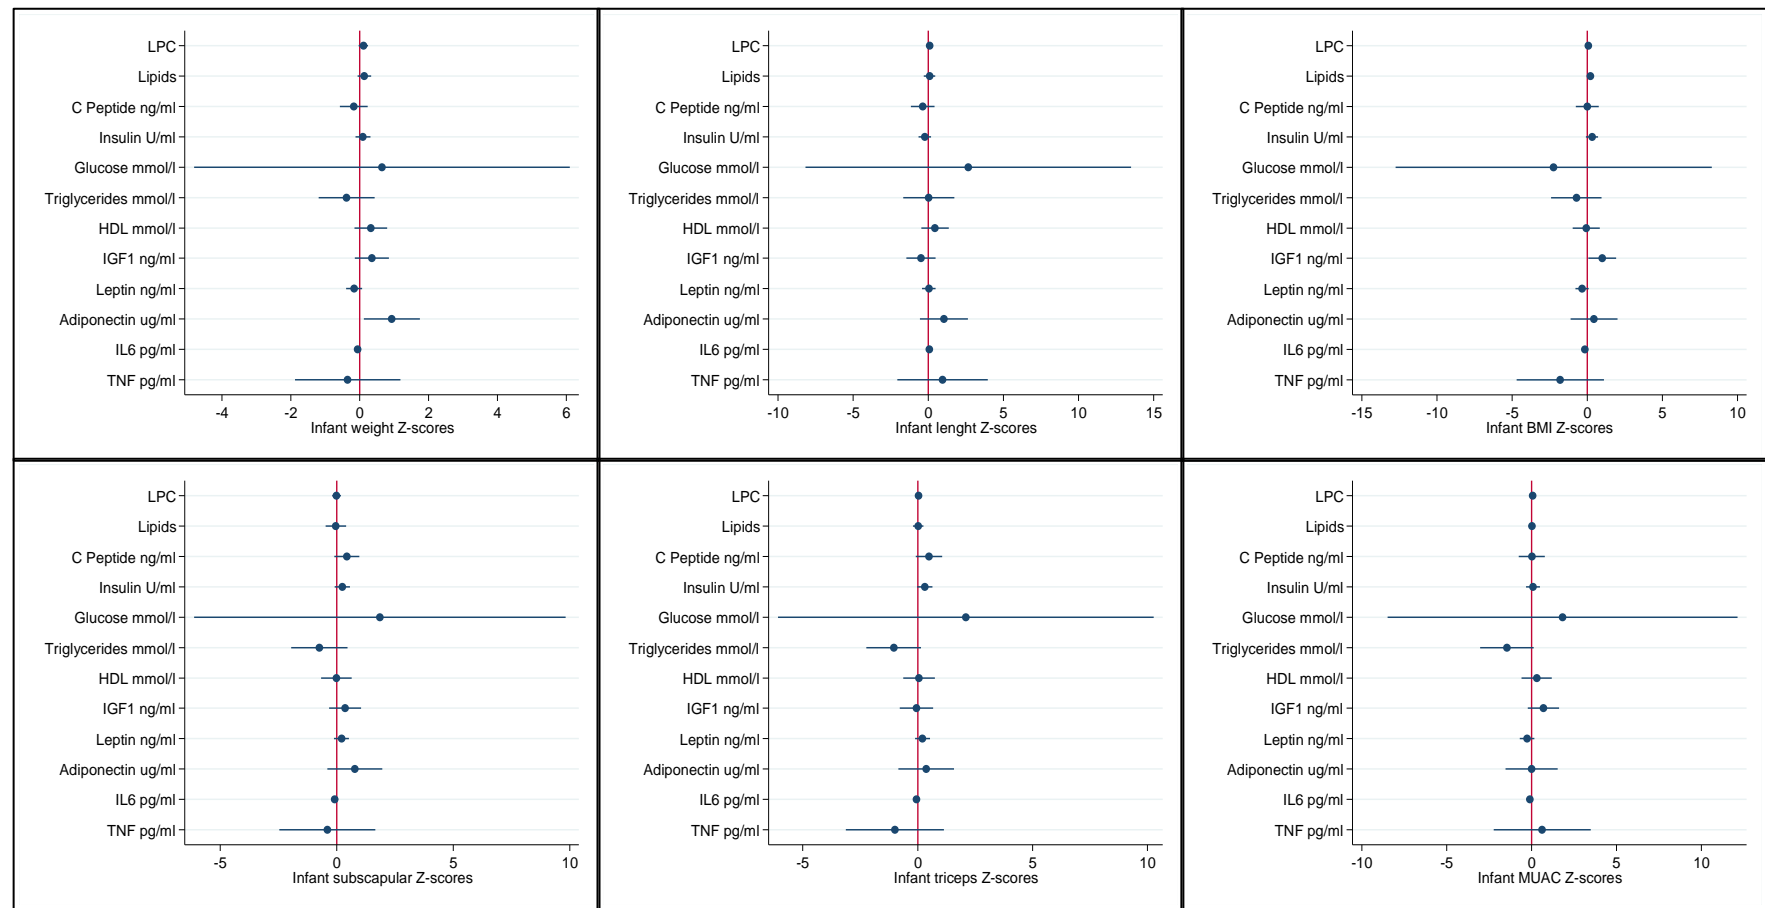

**Supplement Figure 14: Sensitivity analyses of associations between cord blood metabolic profile and infant anthropometry, following exclusion of infants at 6 months exposed to gestational diabetes in-utero (excluded n=111).**

*Regression coefficients with corresponding 95% confidence intervals presented are adjusted for maternal parity, ethnicity, smoker in early pregnancy, gestational weight gain, offspring sex, gestation at delivery, randomisation to UPBEAT Intervention and mode of early life feeding. Abbreviations; HDL- High density lipoprotein; IGF1- Insulin growth factor I; IL6-Interleukin 6; MUAC-Mid upper arm circumference; NEFA-Non-esterified fatty acid; PC-phosphatidylcholine; SDS- Standard deviation scores; SFT- skinfold thickness; TNFalpha- Tumour Necrosis Factor alpha. \* $p < 0.05$ ; \*\* $p < 0.001$ .*

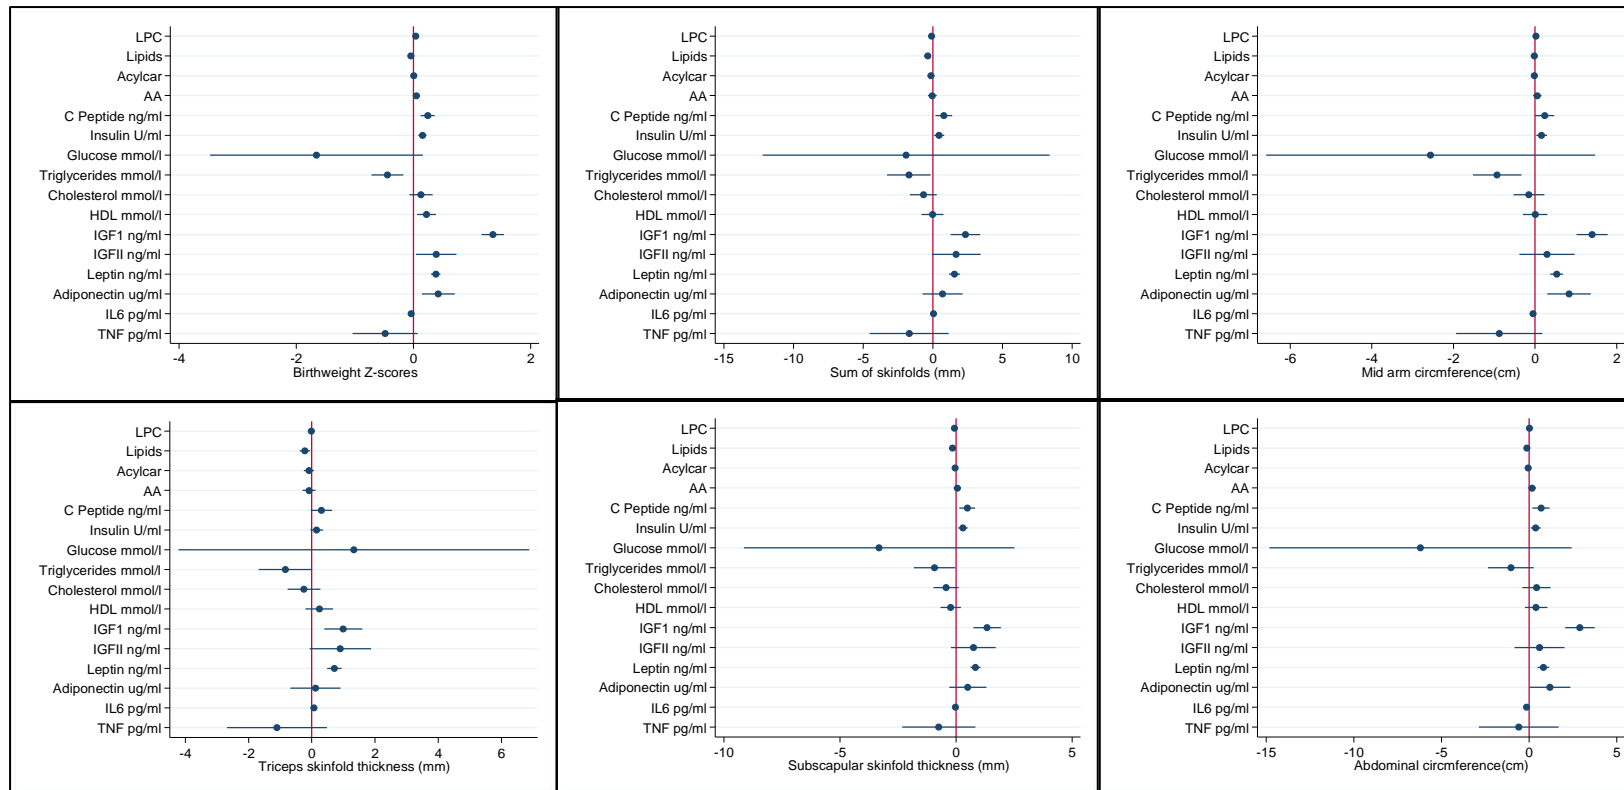

**Supplement Figure 15: Sensitivity analyses of associations between cord blood metabolic profile and neonatal anthropometry, following further adjustment for mode of delivery.**

*Regression coefficients graphically presented with corresponding 95% confidence intervals. Adjustment made for maternal parity, ethnicity, and smoker in early pregnancy, gestational diabetes, gestational weight gain, offspring sex, gestation at delivery, randomisation to UPBEAT Intervention and mode of delivery. Abbreviations; AA-amino acids cluster; Acylcar- Long chain acylcarnitines and TCA metabolites cluster; HDL- High density lipoprotein; IGF1- Insulin growth factor I; IGFII- Insulin growth factor II; IL6-Interleukin 6; MUAC-Mid upper arm circumference; NEFA-Non-esterified fatty acid cluster; PC-phosphatidylcholine cluster; SDS- Standard deviation scores; SFT- skinfold thickness; TNFalpha- Tumour Necrosis Factor alpha*

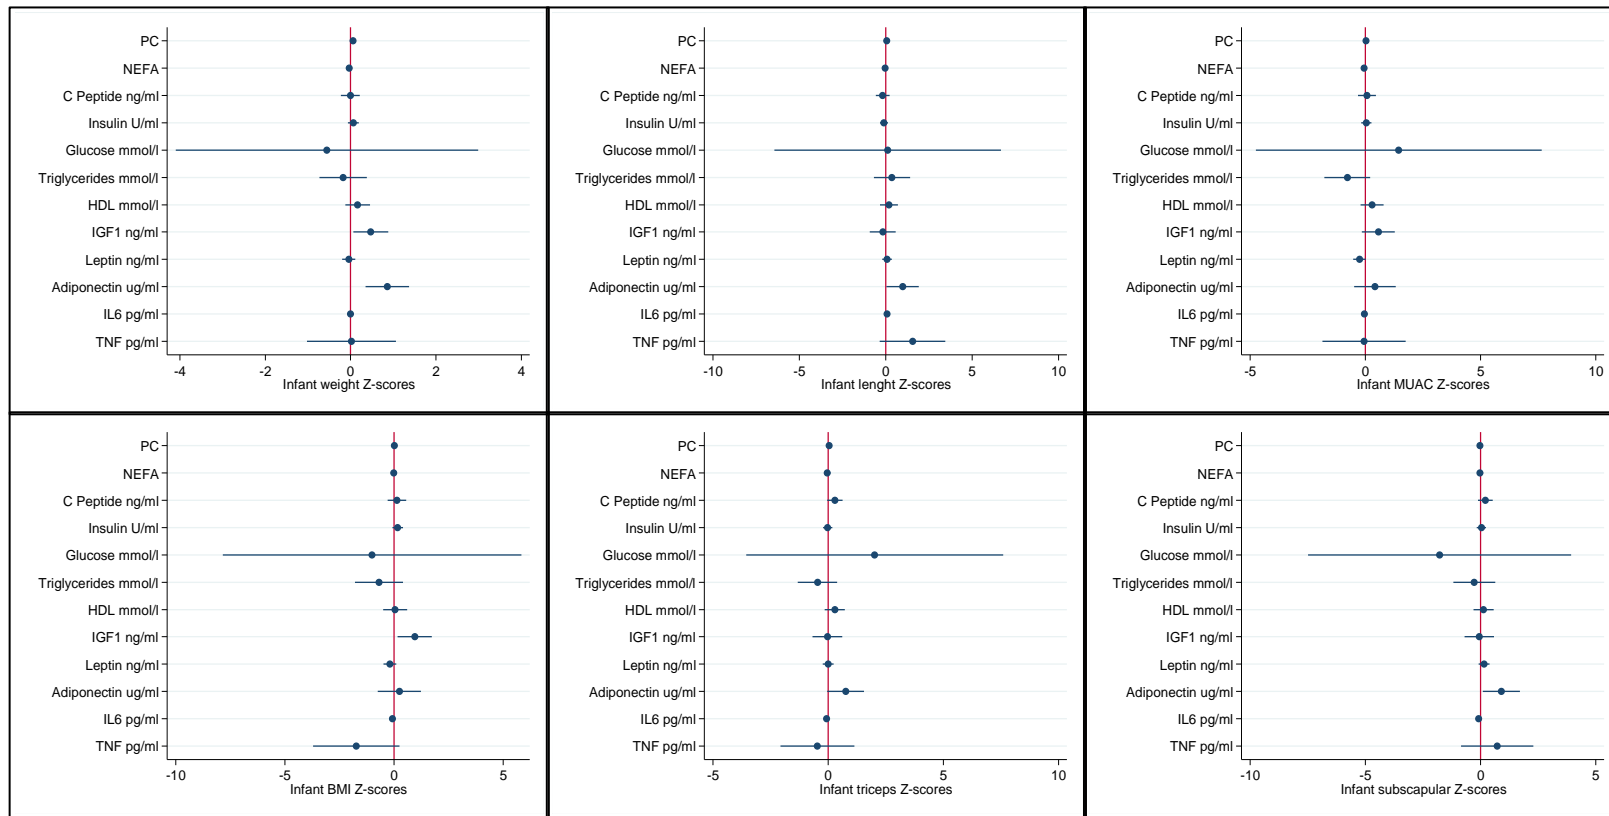

**Supplement Figure 16: Sensitivity analyses of associations between cord blood metabolic profile and infant anthropometry, following adjustment for mode of delivery.**

Regression coefficients with corresponding 95% confidence intervals presented are adjusted for maternal parity, ethnicity, smoker in early pregnancy, gestational weight gain, offspring sex, gestation at delivery, randomisation to UPBEAT Intervention, mode of early life feeding and mode of delivery. Abbreviations; HDL- High density lipoprotein; IGF1- Insulin growth factor I; IL6-Interleukin 6; MUAC-Mid upper arm circumference; NEFA-Non-esterified fatty acid cluster; PC-phosphatidylcholine cluster; TNFalpha- Tumour Necrosis Factor alpha.

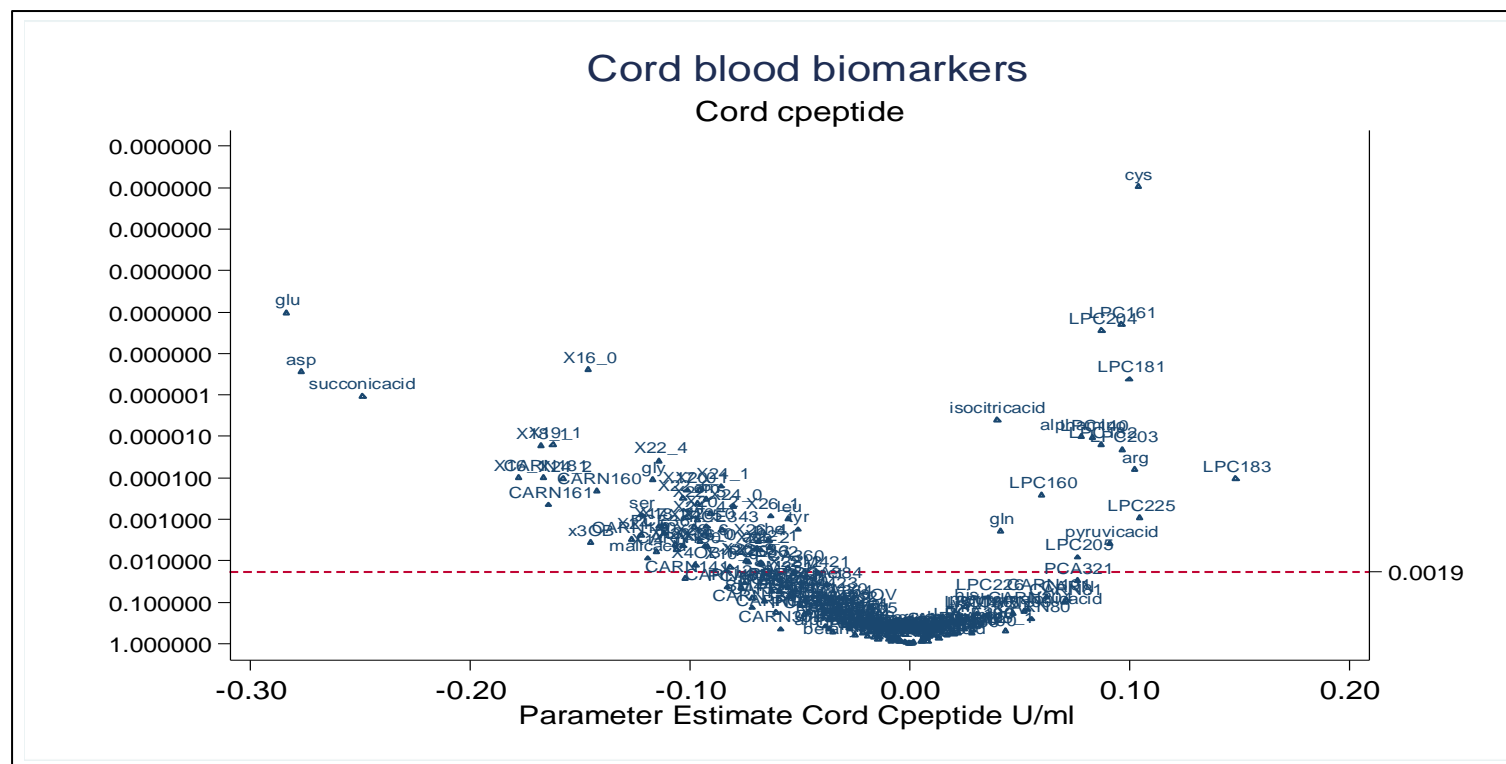

**Supplement Figure 17: Association of cord blood metabolomics profile with cord C-peptide in infants born to obese women; data from the UPBEAT study (n=343).**

Parameter estimates are graphically represented for each biochemical variable in relation to cord blood C-peptide allowing correction for a false discovery rate (Benjamin & Hochberg procedure) (17). Adjustment made for randomisation to the UPBEAT intervention, offspring sex and gestation at delivery. Statistical significance  $p \leq 0.0019$ . Abbreviations; CARN-Carnitines; HDL-High density lipoprotein; IGFI- Insulin growth factor I; IGF II- Insulin growth factor II; IL6- Interleukin 6; LPC- lysophosphatidylcholines; LPCE- lysophosphatidylethanolamine; PC- phosphatidylcholines; PCA- diacylphosphatidylcholines; PCE- acylalkylphosphatidylcholines; SM- sphingomyelins. TNFalpha- Tumor necrosis factor; X30B- x3methyl2oxobutanoicacid; X30V- x4methyl2oxovalericacid. NEFAs are described using the nomenclature CX:Y, where X is the length of the carbon chain, Y is the number of double bonds, OH in the formula means the molecule contains a hydroxyl-group





## References:

1. Harder U, Koletzko B, Peissner W. Quantification of 22 plasma amino acids combining derivatization and ion-pair LC-MS/MS. *Journal of Chromatography*. 2011;879(7-8):495-504.
2. Hellmuth C, Weber M, Koletzko B, Peissner W. Nonesterified fatty acid determination for functional lipidomics: comprehensive ultrahigh performance liquid chromatography-tandem mass spectrometry quantitation, qualification, and parameter prediction. *Analytical chemistry*. 2012;84(3):1483-90.
3. Poston L, Bell R, Croker H, Flynn AC, Godfrey KM, Goff L, et al. Effect of a behavioural intervention in obese pregnant women (the UPBEAT study): a multicentre, randomised controlled trial. *Lancet Diabetes & Endocrinology*. 2015;3:767-77.
4. Sharp GC, Lawlor DA, Richmond RC, Fraser A, Simpkin A, Suderman M, et al. Maternal pre-pregnancy BMI and gestational weight gain, offspring DNA methylation and later offspring adiposity: findings from the Avon Longitudinal Study of Parents and Children. *International journal of epidemiology*. 2015;44:1288-304.
5. Lemas DJ, Brinton JT, Shapiro AL, Glueck DH, Friedman JE, Dabelea D. Associations of maternal weight status prior and during pregnancy with neonatal cardiometabolic markers at birth: the Healthy Start study. *International Journal of Obesity*. 2015;39:1437-42.
6. Joshi NP, Kulkarni SR, Yajnik CS, Joglekar CV, Rao S, Coyaji KJ, et al. Increasing maternal parity predicts neonatal adiposity: Pune Maternal Nutrition Study. *American journal of obstetrics and gynecology*. 2005;193:783-9.
7. Lin X, Aris IM, Tint MT, Soh SE, Godfrey KM, Yeo GS-H, et al. Ethnic Differences in Effects of Maternal Pre-Pregnancy and Pregnancy Adiposity on Offspring Size and Adiposity. *Journal of Clinical Endocrinology and Metabolism*. 2015;100(10):3641-50.
8. Okosun IS, Halbach SM, Dent MM, Cooper RS. Ethnic differences in the rates of low birth weight attributable to differences in early motherhood: a study from the Third National Health and Nutrition Examination Survey. *Journal of Perinatology*. 2000;20(2):105-9.
9. Ranjit N, Wilkinson AV, Lytle LM, Evans AE, Saxton D, Hoelscher DM. Socioeconomic inequalities in children's diet: the role of the home food environment. *International Journal of Behavioral Nutrition and Physical Activity*. 2015;12:1-15.
10. Rolle-Kampczyk UE, Krumsiek J, Otto W, Röder SW, Kohajda T, Borte M, et al. Metabolomics reveals effects of maternal smoking on endogenous metabolites from lipid metabolism in cord blood of newborns. *Metabolomics*. 2016;12:1-12.
11. Fraser A, Tilling K, Macdonald-Wallis C, Sattar N, Brion M-J, Benfield L, et al. Association of Maternal Weight Gain in Pregnancy With Offspring Obesity and Metabolic and Vascular Traits in Childhood. *Circulation*. 2010;121:2557-64.
12. Solis-Paredes M, Espino y Sosa S, Estrada-Gutierrez G, Nava-Salazar S, Ortega-Castillo V, Rodriguez-Bosch M, et al. Maternal and Fetal Lipid and Adipokine Profiles and Their Association with Obesity. *International Journal of Endocrinology*. 2016;1:1-7.
13. Lawlor DA, West J, Fairley L, Nelson SM, Bhopal RS, Tuffnell D, et al. Pregnancy glycaemia and cord-blood levels of insulin and leptin in Pakistani and white British mother-offspring pairs: findings from a prospective pregnancy cohort. *Diabetologia*. 2014;57(12):2492-500.
14. Power ML, Schulkin J. Sex differences in fat storage, fat metabolism, and the health risks from obesity: possible evolutionary origins. *British Journal of Nutrition*. 2008;99(5):931-40.
15. Moco S, Collino S, Rezzi S, Martin F-PJ. Metabolomics perspectives in pediatric research. *Pediatric research*. 2013;73:570-6.
16. Owen CG, Martin RM, Whincup PH, Smith GD, Cook DG. Effect of infant feeding on the risk of obesity across the life course: a quantitative review of published evidence. *Pediatrics*. 2005;115:1367-77.

17. Benjamini Y, Hochberg Y. Controlling the false discovery rate: a practical and powerful approach to multiple testing. *Journal of the Royal Statistical Society* 1995;1:289-300.
18. WHO, de Onis M. Reliability of anthropometric measurements in the WHO Multicentre Growth Reference Study. *Acta Pædiatrica*. 2006;95:38-46.
